# Supplementary material
Source: PubMed Central journal article supplement (PMC5528275)
Supplement: MOL2-5-077-s002.pdf [file MOL2-5-077-s002.pdf]

Supplemental Table 1

3m = Gene is 3' to frag on min Str; 5m = Gene is 5' to frag on min Str; 3p = Gene is 3' to frag on plus Str; 5p = Gene is 5' to frag; in=frag overlapping tss

| Frag_ID       | Chr Name | Start     | End       | Frag Len | pVal     | Dist to TSS    | Gene Name                | Frag Orientation |
|---------------|----------|-----------|-----------|----------|----------|----------------|--------------------------|------------------|
| MspFrag80169  | 10       | 120345113 | 120345331 | 218      | 1.45E-54 | 367            | GPR10                    | 5m               |
| MspFrag152213 | 22       | 43445922  | 43446102  | 180      | 9.31E-49 | 1198           | PRR5                     | 3p               |
| MspFrag108016 | 15       | 72805958  | 72806255  | 297      | 6.29E-48 | 1028           | CYP1A1                   | 5m               |
| MspFrag92849  | 12       | 56290306  | 56290717  | 411      | 2.06E-46 | -350 -61       | AK057416 AK057416        | in in            |
| MspFrag103793 | 14       | 100262666 | 100262888 | 222      | 1.52E-43 | 113            | DLK1                     | 3p               |
| MspFrag33136  | 4        | 9459777   | 9459956   | 179      | 5.09E-43 | -85 -94        | DRD5 DRD5                | in in            |
| MspFrag146564 | 20       | 61463569  | 61463852  | 283      | 1.01E-41 | 430 1786       | CHRNA4 AK127527          | 5m 5p            |
| MspFrag33134  | 4        | 9459349   | 9459626   | 277      | 4.68E-40 | 245            | DRD5                     | 3p               |
| MspFrag54796  | 7        | 30494831  | 30495180  | 349      | 4.18E-37 | -44 -305       | CRHR2 CRHR2              | in in            |
| MspFrag111358 | 16       | 2226616   | 2226830   | 214      | 4.92E-36 | -104 -110      | AY298957 AY298957        | in in            |
| MspFrag57442  | 7        | 99419846  | 99420214  | 368      | 8.76E-36 | -26 205 -342   | STAG3 GPC2 STAG3         | in 5m in         |
| MspFrag80168  | 10       | 120344860 | 120345112 | 252      | 1.29E-34 | 114            | GPR10                    | 5m               |
| MspFrag76797  | 10       | 50489052  | 50489405  | 353      | 2.06E-33 | 1754 700       | CHAT SLC18A3             | 3p 5p            |
| MspFrag59067  | 7        | 136989204 | 136989443 | 239      | 2.72E-32 | 340            | DGKI                     | 5m               |
| MspFrag61099  | 8        | 1759273   | 1759325   | 52       | 2.72E-32 | 223            | ARHGEF10                 | 3p               |
| MspFrag118976 | 17       | 6866584   | 6867057   | 473      | 2.96E-31 | 35             | BCL6B                    | 3p               |
| MspFrag20706  | 2        | 139372061 | 139372477 | 416      | 5.24E-31 | 518            | NXP2                     | 5m               |
| MspFrag6197   | 1        | 47408542  | 47408713  | 171      | 2.85E-30 | 1079           | TAL1                     | 5m               |
| MspFrag42441  | 5        | 134394818 | 134395156 | 338      | 2.85E-30 | 1712           | AK026965                 | 3p               |
| MspFrag70538  | 9        | 98551494  | 98551667  | 173      | 2.85E-30 | 460            | GPR51                    | 5m               |
| MspFrag156440 | 23       | 82569986  | 82570585  | 599      | 6.65E-30 | -218 -381 541  | AK127471 AK127471 POU3F4 | in in 5p         |
| MspFrag78440  | 10       | 94811337  | 94811966  | 629      | 8.60E-30 | 610 327        | AK127234 CYP26C1         | 3p 5p            |
| MspFrag80112  | 10       | 119291788 | 119292000 | 212      | 2.18E-29 | -55 -157       | EMX2 EMX2                | in in            |
| MspFrag80989  | 10       | 133000558 | 133000818 | 260      | 2.18E-29 | 584            | TCERG1L                  | 5m               |
| MspFrag35700  | 4        | 111901776 | 111901955 | 179      | 2.45E-29 | -97 -82        | PITX2 PITX2              | in in            |
| MspFrag39539  | 5        | 33927617  | 33927999  | 382      | 2.45E-29 | -118 -264      | ADAMTS12 ADAMTS12        | in in            |
| MspFrag62294  | 8        | 24826373  | 24826927  | 554      | 2.45E-29 | 284            | NEF3                     | 3p               |
| MspFrag119665 | 17       | 11841560  | 11842309  | 749      | 2.45E-29 | 61             | ZNF18                    | 5m               |
| MspFrag145731 | 20       | 55533586  | 55533993  | 407      | 2.45E-29 | 48 26          | CTCF CTCF                | 3m 5m            |
| MspFrag28326  | 3        | 114643147 | 114643394 | 247      | 2.62E-29 | 117            | WDR52                    | 5m               |
| MspFrag129644 | 18       | 55091846  | 55092225  | 379      | 3.96E-29 | 241            | RAX                      | 5m               |
| MspFrag72750  | 9        | 132485893 | 132486113 | 220      | 7.60E-29 | 1433           | BARHL1                   | 3p               |
| MspFrag23536  | 2        | 233077827 | 233078119 | 292      | 1.91E-28 | 568            | BC067110                 | 5m               |
| MspFrag76801  | 10       | 50489790  | 50491027  | 1237     | 1.91E-28 | 132 1438       | CHAT SLC18A3             | 3p 5p            |
| MspFrag113989 | 16       | 31133694  | 31134196  | 502      | 2.10E-28 | 1700 -365 -137 | PYDC1 AK090695 AK090695  | 3m in in         |
| MspFrag29324  | 3        | 135097550 | 135098100 | 550      | 2.96E-28 | 192            | RAB6B                    | 5m               |
| MspFrag131234 | 19       | 626106    | 626794    | 688      | 8.98E-28 | 622            | FSTL3                    | 3p               |
| MspFrag32611  | 4        | 3571688   | 3573129   | 1441     | 1.06E-27 | 3571 575       | AF336878 LRPAP1          | 3p 5m            |
| MspFrag157770 | 23       | 135838695 | 135839395 | 700      | 1.22E-27 | -42 -658       | GPR101 GPR101            | in in            |
| MspFrag26333  | 3        | 46909242  | 46909602  | 360      | 1.53E-27 | -312 -48       | AF495723 AF495723        | in in            |
| MspFrag88411  | 11       | 107304811 | 107304985 | 174      | 8.03E-27 | 582 325        | AK128062 RAB39           | 5m 5p            |
| MspFrag13394  | 1        | 227605182 | 227605359 | 177      | 8.93E-27 | 49             | TRIM67                   | 3p               |
| MspFrag46277  | 6        | 16237147  | 16237395  | 248      | 8.93E-27 | -100 -148      | MYLIP MYLIP              | in in            |
| MspFrag10916  | 1        | 172907883 | 172908042 | 159      | 5.43E-26 | -15 -144       | RFWD2 RFWD2              | in in            |
| MspFrag118998 | 17       | 6888109   | 6888394   | 285      | 5.43E-26 | 143            | SLC16A11                 | 5m               |
| MspFrag145587 | 20       | 52525004  | 52525348  | 344      | 5.43E-26 | 315            | DOK5                     | 3p               |
| MspFrag82859  | 11       | 2864180   | 2864505   | 325      | 1.35E-25 | 603            | CDKN1C                   | 5m               |
| MspFrag134630 | 19       | 9334315   | 9334667   | 352      | 1.35E-25 | 28             | ZNF177                   | 3p               |
| MspFrag9278   | 1        | 146064945 | 146066503 | 1558     | 2.09E-25 | -1167 -391     | AK124550 AK124550        | in in            |
| MspFrag147896 | 21       | 36992311  | 36992534  | 223      | 2.77E-25 | 1326           | SIM2                     | 3p               |
| MspFrag121117 | 17       | 29507543  | 29508230  | 687      | 2.87E-25 | -292 -395      | ACCN1 ACCN1              | in in            |
| MspFrag7153   | 1        | 67312523  | 67312727  | 204      | 3.07E-25 | -53 -151       | BC047053 BC047053        | in in            |
| MspFrag105873 | 15       | 38437638  | 38437690  | 52       | 3.07E-25 | 35             | DISP2                    | 3p               |
| MspFrag112325 | 16       | 10387218  | 10387406  | 188      | 3.07E-25 | 6              | AK093414                 | 3p               |
| MspFrag118936 | 17       | 6557888   | 6557950   | 62       | 3.07E-25 | 479            | AK172785                 | 5m               |
| MspFrag63043  | 8        | 41774590  | 41774866  | 276      | 4.16E-25 | 293            | ANK1                     | 5m               |
| MspFrag50444  | 6        | 123359218 | 123359439 | 221      | 7.29E-25 | 93 404         | C6orf213 C6orf213        | 3p 5p            |
| MspFrag102061 | 14       | 64638719  | 64638995  | 276      | 1.47E-24 | -15 -261       | MAX MAX                  | in in            |
| MspFrag2643   | 1        | 14669841  | 14670071  | 230      | 1.63E-24 | 434            | AB028949                 | 3p               |
| MspFrag5980   | 1        | 44977457  | 44977763  | 306      | 1.63E-24 | -54 -252       | PTCH2 PTCH2              | in in            |
| MspFrag22213  | 2        | 200159441 | 200159639 | 198      | 1.63E-24 | 485            | FLJ32063                 | 3p               |
| MspFrag87698  | 11       | 76059797  | 76059981  | 184      | 1.63E-24 | 361            | BC052210                 | 5m               |

|               |    |           |           |      |          |                 |                               |             |
|---------------|----|-----------|-----------|------|----------|-----------------|-------------------------------|-------------|
| MspFrag88517  | 11 | 110916170 | 110916785 | 615  | 2.29E-24 | 877 -156 -459   | AK096925 AY358554 AY358554    | 3m in in    |
| MspFrag143864 | 20 | 25012556  | 25012953  | 397  | 3.99E-24 | 1789            | VSX1                          | 5m          |
| MspFrag9937   | 1  | 152103832 | 152104033 | 201  | 5.47E-24 | 375 2767 638 44 | FLJ35976 BC052277 AK125510 RU | 3m 3p 5m 5p |
| MspFrag90140  | 12 | 3473198   | 3473610   | 412  | 5.63E-24 | 952             | AK125333                      | 5m          |
| MspFrag27677  | 3  | 69184229  | 69184352  | 123  | 8.13E-24 | 302             | TMF1                          | 5m          |
| MspFrag115870 | 16 | 67977524  | 67977617  | 93   | 8.13E-24 | 149             | TERF2                         | 5m          |
| MspFrag7359   | 1  | 79184005  | 79184422  | 417  | 1.78E-23 | -40 -377        | BC025721 BC025721             | in in       |
| MspFrag11354  | 1  | 194611559 | 194611928 | 369  | 2.68E-23 | 1363            | LHX9                          | 3p          |
| MspFrag98985  | 13 | 99421760  | 99422234  | 474  | 3.49E-23 | -55 -419        | ZIC5 ZIC5                     | in in       |
| MspFrag8956   | 1  | 120551325 | 120551421 | 96   | 3.84E-23 | 32 1322 299     | BC046199 AK124556 AB096683    | 3p 5m 5p    |
| MspFrag14656  | 2  | 10133476  | 10133666  | 190  | 3.84E-23 | 613             | KLF11                         | 3p          |
| MspFrag90137  | 12 | 3472552   | 3472916   | 364  | 3.84E-23 | 306 1535        | AK125333 HRMT1L4              | 5m 5p       |
| MspFrag98264  | 13 | 57102098  | 57102284  | 186  | 3.84E-23 | 1660            | PCDH17                        | 3p          |
| MspFrag121727 | 17 | 34635687  | 34635916  | 229  | 3.84E-23 | 187             | STAC2                         | 5m          |
| MspFrag151528 | 22 | 37962171  | 37962758  | 587  | 3.84E-23 | 752             | PDGFB                         | 5m          |
| MspFrag64684  | 8  | 97242768  | 97243023  | 255  | 4.63E-23 | 572             | GDF6                          | 5m          |
| MspFrag77115  | 10 | 64248087  | 64248491  | 404  | 1.57E-22 | 1954            | EGR2                          | 5m          |
| MspFrag156491 | 23 | 90495771  | 90495990  | 219  | 1.57E-22 | -23 -196        | BC063113 BC063113             | in in       |
| MspFrag38457  | 5  | 1348431   | 1348617   | 186  | 1.72E-22 | 272             | TERT                          | 5m          |
| MspFrag56922  | 7  | 87208109  | 87208310  | 201  | 1.72E-22 | -94 -107        | BC092465 BC092465             | in in       |
| MspFrag73907  | 9  | 137307963 | 137309295 | 1332 | 1.72E-22 | -617 -715       | GRIN1 GRIN1                   | in in       |
| MspFrag113614 | 16 | 30112985  | 30113118  | 133  | 1.72E-22 | 10 851 480 268  | BC022832 SULT1A3 BC062756 GIY | 3m 3p 5m 5p |
| MspFrag158867 | 24 | 554703    | 554798    | 95   | 1.72E-22 | 280             | SHOX                          | 3p          |
| MspFrag145069 | 20 | 43952201  | 43952384  | 183  | 1.97E-22 | 924 986 2556    | NEURL2 AB209705 C20orf165     | 3m 3p 5m    |
| MspFrag20225  | 2  | 128792924 | 128793466 | 542  | 3.50E-22 | 442             | HS6ST1                        | 5m          |
| MspFrag138522 | 19 | 44618313  | 44618420  | 107  | 3.50E-22 | -7 -100         | BC071674 BC071674             | in in       |
| MspFrag141818 | 19 | 61770691  | 61770887  | 196  | 3.50E-22 | 301             | FLJ26175                      | 3p          |
| MspFrag23738  | 2  | 236183911 | 236184343 | 432  | 5.19E-22 | 426             | CENTG2                        | 3p          |
| MspFrag76467  | 10 | 44201213  | 44201571  | 358  | 5.19E-22 | 662             | CXCL12                        | 5m          |
| MspFrag135413 | 19 | 12996583  | 12996817  | 234  | 5.19E-22 | -42 -192        | NFIX NFIX                     | in in       |
| MspFrag9029   | 1  | 142697968 | 142698037 | 69   | 6.69E-22 | 120             | NOTCH2NL                      | 3p          |
| MspFrag45650  | 6  | 3401937   | 3401968   | 31   | 6.69E-22 | 203             | BC040876                      | 5m          |
| MspFrag89183  | 11 | 122571813 | 122572088 | 275  | 6.69E-22 | 596             | ASAM                          | 5m          |
| MspFrag27495  | 3  | 62333914  | 62333971  | 57   | 7.34E-22 | 90 124          | ZNF312 AK001004               | 3m 5m       |
| MspFrag68663  | 9  | 37743792  | 37744031  | 239  | 7.34E-22 | -219 -20        | BC057774 BC057774             | in in       |
| MspFrag69380  | 9  | 76862972  | 76863247  | 275  | 7.34E-22 | 877             | LOC442425                     | 3p          |
| MspFrag71700  | 9  | 125589095 | 125589132 | 37   | 7.34E-22 | 87 710          | PBX3 AF159054                 | 3p 5m       |

| Supplemental Table 2                                                                                                                                        |          |           |           |          |             |                   |                  |
|-------------------------------------------------------------------------------------------------------------------------------------------------------------|----------|-----------|-----------|----------|-------------|-------------------|------------------|
| 3m = Gene is 3' to frag on min Str; 5m = Gene is 5' to frag on min Str; 3p = Gene is 3' to frag on plus Str; 5p= Gene is 5' to frag;in=frag overlapping tss |          |           |           |          |             |                   |                  |
| Frag_ID                                                                                                                                                     | Chr Name | Start     | End       | Frag Len | Dist to TSS | Gene Name         | Frag Orientation |
| MspFrag152494                                                                                                                                               | 22       | 45250387  | 45250713  | 326      |             |                   |                  |
| MspFrag110545                                                                                                                                               | 16       | 954593    | 954879    | 286      | 108         | AK127296          | 3p               |
| MspFrag1211                                                                                                                                                 | 1        | 2622522   | 2623091   | 569      |             |                   |                  |
| MspFrag79636                                                                                                                                                | 10       | 107141635 | 107141970 | 335      |             |                   |                  |
| MspFrag1212                                                                                                                                                 | 1        | 2629273   | 2629613   | 340      |             |                   |                  |
| MspFrag134007                                                                                                                                               | 19       | 5865969   | 5866340   | 371      | 751         | CAPS              | 5p               |
| MspFrag156922                                                                                                                                               | 23       | 114782761 | 114783003 | 242      |             |                   |                  |
| MspFrag12301                                                                                                                                                | 1        | 217252591 | 217253153 | 562      | 535         | FLJ14146          | 5p               |
| MspFrag80343                                                                                                                                                | 10       | 123771228 | 123771724 | 496      |             |                   |                  |
| MspFrag86939                                                                                                                                                | 11       | 67937373  | 67937857  | 484      |             |                   |                  |
| MspFrag61350                                                                                                                                                | 8        | 7917174   | 7917432   | 258      |             |                   |                  |
| MspFrag14289                                                                                                                                                | 2        | 2812784   | 2813304   | 520      |             |                   |                  |
| MspFrag55649                                                                                                                                                | 7        | 54862496  | 54862960  | 464      | 1477        | EGFR              | 5p               |
| MspFrag152714                                                                                                                                               | 22       | 47818757  | 47819111  | 354      |             |                   |                  |
| MspFrag153365                                                                                                                                               | 23       | 107442    | 107957    | 515      |             |                   |                  |
| MspFrag61152                                                                                                                                                | 8        | 1982797   | 1983256   | 459      |             |                   |                  |
| MspFrag133765                                                                                                                                               | 19       | 4987710   | 4988218   | 508      |             |                   |                  |
| MspFrag1650                                                                                                                                                 | 1        | 5490384   | 5490940   | 556      |             |                   |                  |
| MspFrag114140                                                                                                                                               | 16       | 32594594  | 32594816  | 222      | 135         | TP53TG3           | 3m               |
| MspFrag102005                                                                                                                                               | 14       | 64078276  | 64078714  | 438      |             |                   |                  |
| MspFrag25023                                                                                                                                                | 3        | 13136633  | 13137251  | 618      |             |                   |                  |
| MspFrag152632                                                                                                                                               | 22       | 47145509  | 47145882  | 373      |             |                   |                  |
| MspFrag158649                                                                                                                                               | 24       | 107442    | 107957    | 515      |             |                   |                  |
| MspFrag104383                                                                                                                                               | 14       | 103840309 | 103840685 | 376      |             |                   |                  |
| MspFrag124812                                                                                                                                               | 17       | 69147185  | 69147915  | 730      |             |                   |                  |
| MspFrag130916                                                                                                                                               | 19       | 356947    | 357309    | 362      |             |                   |                  |
| MspFrag114205                                                                                                                                               | 16       | 33113217  | 33113439  | 222      | 134         | TP53TG3           | 5p               |
| MspFrag114218                                                                                                                                               | 16       | 33169752  | 33169974  | 222      | 134         | TP53TG3           | 5p               |
| MspFrag128737                                                                                                                                               | 18       | 31331934  | 31332447  | 513      | -494 -19    | C18orf37 C18orf37 | in in            |
| MspFrag33381                                                                                                                                                | 4        | 16273567  | 16273855  | 288      |             |                   |                  |
| MspFrag129193                                                                                                                                               | 18       | 44375040  | 44375381  | 341      |             |                   |                  |
| MspFrag145469                                                                                                                                               | 20       | 49009098  | 49009532  | 434      | 631 329     | DPM1 MOC3         | 5m 5p            |
| MspFrag5071                                                                                                                                                 | 1        | 36908888  | 36909106  | 218      |             |                   |                  |
| MspFrag144651                                                                                                                                               | 20       | 36509200  | 36509785  | 585      | 447         | LOC128439         | 5p               |
| MspFrag54143                                                                                                                                                | 7        | 21829594  | 21830366  | 772      |             |                   |                  |
| MspFrag14197                                                                                                                                                | 2        | 1248326   | 1248943   | 617      |             |                   |                  |
| MspFrag21537                                                                                                                                                | 2        | 175420626 | 175420995 | 369      |             |                   |                  |
| MspFrag86495                                                                                                                                                | 11       | 65945827  | 65946236  | 409      | 777         | NXF               | 5p               |
| MspFrag114087                                                                                                                                               | 16       | 32003855  | 32004417  | 562      |             |                   |                  |
| MspFrag97775                                                                                                                                                | 13       | 43876711  | 43877202  | 491      |             |                   |                  |
| MspFrag57677                                                                                                                                                | 7        | 100240230 | 100240525 | 295      |             |                   |                  |
| MspFrag38485                                                                                                                                                | 5        | 1440104   | 1440605   | 501      |             |                   |                  |
| MspFrag86866                                                                                                                                                | 11       | 67527006  | 67527364  | 358      |             |                   |                  |
| MspFrag99554                                                                                                                                                | 13       | 111836670 | 111837162 | 492      |             |                   |                  |
| MspFrag74424                                                                                                                                                | 10       | 521032    | 521557    | 525      |             |                   |                  |
| MspFrag89848                                                                                                                                                | 12       | 432342    | 432620    | 278      |             |                   |                  |
| MspFrag110668                                                                                                                                               | 16       | 1094736   | 1095111   | 375      |             |                   |                  |
| MspFrag1601                                                                                                                                                 | 1        | 4360224   | 4360668   | 444      |             |                   |                  |
| MspFrag103518                                                                                                                                               | 14       | 97286503  | 97287063  | 560      |             |                   |                  |
| MspFrag62044                                                                                                                                                | 8        | 22045386  | 22045723  | 337      | 1411        | HR                | 5m               |
| MspFrag123625                                                                                                                                               | 17       | 47100530  | 47100939  | 409      |             |                   |                  |

|               |    |           |           |     |          |                   |       |
|---------------|----|-----------|-----------|-----|----------|-------------------|-------|
| MspFrag80975  | 10 | 132947917 | 132948395 | 478 |          |                   |       |
| MspFrag8101   | 1  | 101535648 | 101535994 | 346 |          |                   |       |
| MspFrag65671  | 8  | 135560191 | 135560433 | 242 |          |                   |       |
| MspFrag95908  | 12 | 130037881 | 130038220 | 339 | 3715     | AK125937          | 5m    |
| MspFrag152321 | 22 | 44582503  | 44582872  | 369 |          |                   |       |
| MspFrag153363 | 23 | 106948    | 107207    | 259 |          |                   |       |
| MspFrag158646 | 24 | 106714    | 106947    | 233 |          |                   |       |
| MspFrag158647 | 24 | 106948    | 107207    | 259 |          |                   |       |
| MspFrag80854  | 10 | 131646461 | 131646892 | 431 |          |                   |       |
| MspFrag131881 | 19 | 1225717   | 1226067   | 350 | 483 4458 | C19orf24 C19orf23 | 3p 5m |
| MspFrag153362 | 23 | 106714    | 106947    | 233 |          |                   |       |
| MspFrag1311   | 1  | 3036436   | 3036818   | 382 |          |                   |       |
| MspFrag72675  | 9  | 131728907 | 131729282 | 375 |          |                   |       |
| MspFrag120416 | 17 | 21214632  | 21214932  | 300 |          |                   |       |
| MspFrag128414 | 18 | 19973409  | 19973979  | 570 | 457      | CABYR             | 5p    |
| MspFrag128850 | 18 | 33320380  | 33321106  | 726 | 843      | AK126716          | 5m    |
| MspFrag146035 | 20 | 59903253  | 59903692  | 439 |          |                   |       |
| MspFrag149794 | 22 | 19039962  | 19040676  | 714 |          |                   |       |
| MspFrag13583  | 1  | 232131677 | 232132379 | 702 |          |                   |       |
| MspFrag145928 | 20 | 57131598  | 57132025  | 427 |          |                   |       |
| MspFrag39470  | 5  | 31716178  | 31716614  | 436 |          |                   |       |
| MspFrag61003  | 8  | 1239397   | 1239831   | 434 |          |                   |       |
| MspFrag7228   | 1  | 71223914  | 71224499  | 585 | 782      | AY387856          | 3m    |
| MspFrag45501  | 6  | 1625429   | 1625752   | 323 |          |                   |       |
| MspFrag120581 | 17 | 23756303  | 23756683  | 380 |          |                   |       |
| MspFrag4109   | 1  | 27008738  | 27009387  | 649 |          |                   |       |
| MspFrag5455   | 1  | 40267780  | 40268103  | 323 |          |                   |       |
| MspFrag52027  | 6  | 168452341 | 168452651 | 310 |          |                   |       |
| MspFrag122955 | 17 | 43222694  | 43222900  | 206 |          |                   |       |
| MspFrag143827 | 20 | 24742336  | 24742752  | 416 |          |                   |       |
| MspFrag61051  | 8  | 1470634   | 1471413   | 779 |          |                   |       |
| MspFrag73586  | 9  | 136866193 | 136866519 | 326 |          |                   |       |
| MspFrag124390 | 17 | 60203136  | 60203426  | 290 |          |                   |       |
| MspFrag67459  | 9  | 2613599   | 2614303   | 704 | 1411     | VLDLR             | 5p    |
| MspFrag63030  | 8  | 41702523  | 41702937  | 414 |          |                   |       |
| MspFrag146427 | 20 | 61189329  | 61189632  | 303 |          |                   |       |
| MspFrag38815  | 5  | 2919629   | 2920003   | 374 |          |                   |       |
| MspFrag148921 | 21 | 46119009  | 46119510  | 501 |          |                   |       |
| MspFrag8169   | 1  | 108675712 | 108676003 | 291 |          |                   |       |
| MspFrag1173   | 1  | 2518915   | 2519285   | 370 |          |                   |       |
| MspFrag27115  | 3  | 52543768  | 52544136  | 368 | -26 -342 | FLJ12442 FLJ12442 | in in |
| MspFrag63267  | 8  | 49697557  | 49697886  | 329 |          |                   |       |
| MspFrag19926  | 2  | 121038231 | 121038980 | 749 |          |                   |       |
| MspFrag114107 | 16 | 32172277  | 32172824  | 547 | 133      | TP53TG3           | 5p    |
| MspFrag153364 | 23 | 107208    | 107441    | 233 |          |                   |       |
| MspFrag158648 | 24 | 107208    | 107441    | 233 |          |                   |       |
| MspFrag111585 | 16 | 2756264   | 2756492   | 228 |          |                   |       |
| MspFrag32667  | 4  | 3914642   | 3915363   | 721 |          |                   |       |
| MspFrag103295 | 14 | 92767021  | 92767589  | 568 |          |                   |       |
| MspFrag79123  | 10 | 102798099 | 102798651 | 552 |          |                   |       |
| MspFrag142940 | 20 | 4150615   | 4151066   | 451 |          |                   |       |
| MspFrag60291  | 7  | 155610859 | 155611142 | 283 |          |                   |       |
| MspFrag152655 | 22 | 47247350  | 47247678  | 328 |          |                   |       |
| MspFrag10427  | 1  | 158232923 | 158233174 | 251 |          |                   |       |
| MspFrag80645  | 10 | 126830955 | 126831650 | 695 |          |                   |       |

|               |    |           |           |     |              |                        |          |
|---------------|----|-----------|-----------|-----|--------------|------------------------|----------|
| MspFrag45007  | 5  | 179673647 | 179673858 | 211 |              |                        |          |
| MspFrag9601   | 1  | 148893238 | 148893494 | 256 |              |                        |          |
| MspFrag114138 | 16 | 32593842  | 32594268  | 426 | 683          | TP53TG3                | 3m       |
| MspFrag4823   | 1  | 33955400  | 33955873  | 473 |              |                        |          |
| MspFrag1961   | 1  | 6949999   | 6950306   | 307 |              |                        |          |
| MspFrag123622 | 17 | 46894551  | 46894949  | 398 |              |                        |          |
| MspFrag149824 | 22 | 19109258  | 19109530  | 272 |              |                        |          |
| MspFrag14609  | 2  | 9553132   | 9553410   | 278 |              |                        |          |
| MspFrag57002  | 7  | 90540824  | 90541294  | 470 |              |                        |          |
| MspFrag72674  | 9  | 131728566 | 131728859 | 293 |              |                        |          |
| MspFrag76619  | 10 | 47227978  | 47228669  | 691 |              |                        |          |
| MspFrag80726  | 10 | 128183447 | 128184143 | 696 |              |                        |          |
| MspFrag22928  | 2  | 220021958 | 220022344 | 386 |              |                        |          |
| MspFrag127886 | 18 | 11365685  | 11366062  | 377 |              |                        |          |
| MspFrag22546  | 2  | 209899069 | 209899548 | 479 |              |                        |          |
| MspFrag126928 | 17 | 77787428  | 77787810  | 382 |              |                        |          |
| MspFrag14921  | 2  | 15857512  | 15857896  | 384 |              |                        |          |
| MspFrag56402  | 7  | 72563341  | 72563657  | 316 |              |                        |          |
| MspFrag1340   | 1  | 3165605   | 3166112   | 507 |              |                        |          |
| MspFrag9245   | 1  | 145643787 | 145644444 | 657 | -397 -260    | AK095105 AK095105      | in in    |
| MspFrag5104   | 1  | 37589882  | 37590168  | 286 |              |                        |          |
| MspFrag115442 | 16 | 65776185  | 65776573  | 388 | 1208         | BC080183               | 5m       |
| MspFrag150632 | 22 | 28031149  | 28031471  | 322 |              |                        |          |
| MspFrag151564 | 22 | 38109182  | 38109628  | 446 |              |                        |          |
| MspFrag149605 | 22 | 18168920  | 18169266  | 346 |              |                        |          |
| MspFrag85976  | 11 | 64496008  | 64496486  | 478 |              |                        |          |
| MspFrag69976  | 9  | 93159730  | 93160221  | 491 |              |                        |          |
| MspFrag128857 | 18 | 33399522  | 33399998  | 476 | -210 -266    | BRUNOL4 BRUNOL4        | in in    |
| MspFrag25715  | 3  | 35760405  | 35760961  | 556 |              |                        |          |
| MspFrag71104  | 9  | 112924678 | 112925035 | 357 |              |                        |          |
| MspFrag150393 | 22 | 24071950  | 24072354  | 404 |              |                        |          |
| MspFrag77199  | 10 | 69760469  | 69761198  | 729 | 1457 -262 -4 | AK027673 HNRPH3 HNRPH3 | 3m in in |
| MspFrag52792  | 7  | 1206082   | 1206625   | 543 |              |                        |          |
| MspFrag10496  | 1  | 158247714 | 158247965 | 251 |              |                        |          |
| MspFrag132985 | 19 | 2839734   | 2840151   | 417 |              |                        |          |
| MspFrag118551 | 17 | 3742185   | 3742440   | 255 | 646          | CAMKK1                 | 3m       |
| MspFrag113247 | 16 | 27656752  | 27657519  | 767 |              |                        |          |
| MspFrag10189  | 1  | 153690285 | 153690897 | 612 |              |                        |          |
| MspFrag127254 | 17 | 78640698  | 78640912  | 214 |              |                        |          |
| MspFrag17697  | 2  | 73589558  | 73590193  | 635 |              |                        |          |
| MspFrag47435  | 6  | 33353475  | 33353858  | 383 | 581          | B3GALT4                | 5p       |
| MspFrag92237  | 12 | 50913530  | 50913916  | 386 | 310          | KRT7                   | 5p       |
| MspFrag19965  | 2  | 121259357 | 121259763 | 406 |              |                        |          |
| MspFrag45338  | 6  | 1311232   | 1311666   | 434 |              |                        |          |
| MspFrag95107  | 12 | 119463497 | 119464156 | 659 |              |                        |          |
| MspFrag105880 | 15 | 38446968  | 38447392  | 424 |              |                        |          |
| MspFrag152489 | 22 | 45194587  | 45195050  | 463 |              |                        |          |
| MspFrag15644  | 2  | 27515565  | 27515896  | 331 | 321          | ZNF513                 | 5m       |
| MspFrag38281  | 5  | 1011369   | 1011836   | 467 |              |                        |          |
| MspFrag47196  | 6  | 31804402  | 31804867  | 465 | 396          | CR616443               | 3m       |
| MspFrag143736 | 20 | 22976785  | 22977176  | 391 | 1125         | THBD                   | 3m       |
| MspFrag152496 | 22 | 45250831  | 45251397  | 566 |              |                        |          |
| MspFrag117255 | 16 | 87152490  | 87152873  | 383 |              |                        |          |
| MspFrag138648 | 19 | 45421947  | 45422225  | 278 |              |                        |          |
| MspFrag152748 | 22 | 48288961  | 48289335  | 374 |              |                        |          |

|               |    |           |           |     |          |                     |       |
|---------------|----|-----------|-----------|-----|----------|---------------------|-------|
| MspFrag33110  | 4  | 9006410   | 9006713   | 303 | 1192     | DUB3                | 3p    |
| MspFrag100018 | 13 | 113964379 | 113964675 | 296 |          |                     |       |
| MspFrag126936 | 17 | 77793664  | 77794026  | 362 |          |                     |       |
| MspFrag93929  | 12 | 100105780 | 100106149 | 369 | 308      | SLC5A8              | 3m    |
| MspFrag52897  | 7  | 1460124   | 1460484   | 360 |          |                     |       |
| MspFrag85089  | 11 | 58487399  | 58488005  | 606 |          |                     |       |
| MspFrag136763 | 19 | 18868351  | 18868732  | 381 | 398      | LASS1               | 5m    |
| MspFrag149791 | 22 | 19038477  | 19039097  | 620 |          |                     |       |
| MspFrag121187 | 17 | 30501738  | 30502428  | 690 |          |                     |       |
| MspFrag38417  | 5  | 1302864   | 1303240   | 376 |          |                     |       |
| MspFrag53338  | 7  | 4884663   | 4885032   | 369 | -60 -309 | LOC389458 LOC389458 | in in |
| MspFrag94367  | 12 | 108636999 | 108637342 | 343 |          |                     |       |
| MspFrag114207 | 16 | 33113765  | 33114191  | 426 | 682      | TP53TG3             | 5p    |
| MspFrag134481 | 19 | 8278100   | 8278802   | 702 | 437      | CD320               | 3m    |
| MspFrag85656  | 11 | 63640294  | 63640522  | 228 |          |                     |       |
| MspFrag91076  | 12 | 28018747  | 28019241  | 494 | 2564     | PTHLH               | 5m    |
| MspFrag98223  | 13 | 52674273  | 52674824  | 551 |          |                     |       |
| MspFrag108348 | 15 | 76073603  | 76074094  | 491 |          |                     |       |
| MspFrag1359   | 1  | 3218362   | 3218653   | 291 |          |                     |       |
| MspFrag14203  | 2  | 1296483   | 1297255   | 772 |          |                     |       |
| MspFrag147018 | 20 | 62158835  | 62159160  | 325 | -278 -47 | TCEA2 TCEA2         | in in |
| MspFrag26295  | 3  | 46828327  | 46828820  | 493 | 232      | AK128390            | 3m    |
| MspFrag1649   | 1  | 5478055   | 5478432   | 377 |          |                     |       |
| MspFrag88655  | 11 | 113989177 | 113989682 | 505 |          |                     |       |
| MspFrag116804 | 16 | 85098845  | 85099404  | 559 | 2254     | FOXF1               | 3p    |
| MspFrag121549 | 17 | 33919151  | 33919636  | 485 |          |                     |       |
| MspFrag107570 | 15 | 66794080  | 66794622  | 542 |          |                     |       |
| MspFrag114139 | 16 | 32594269  | 32594593  | 324 | 358      | TP53TG3             | 3m    |
| MspFrag74598  | 10 | 1740057   | 1740811   | 754 |          |                     |       |
| MspFrag110579 | 16 | 972953    | 973346    | 393 | 1145     | SOX8                | 5p    |
| MspFrag32966  | 4  | 7107197   | 7107478   | 281 |          |                     |       |
| MspFrag84490  | 11 | 43921200  | 43921449  | 249 |          |                     |       |
| MspFrag65670  | 8  | 135559922 | 135560190 | 268 |          |                     |       |
| MspFrag158845 | 24 | 407042    | 407560    | 518 |          |                     |       |
| MspFrag14202  | 2  | 1293040   | 1293404   | 364 |          |                     |       |
| MspFrag1242   | 1  | 2873712   | 2874055   | 343 |          |                     |       |
| MspFrag68271  | 9  | 34362590  | 34362891  | 301 |          |                     |       |
| MspFrag55275  | 7  | 43877824  | 43878339  | 515 | 64       | PGAM2               | 3m    |
| MspFrag114220 | 16 | 33170300  | 33170726  | 426 | 682      | TP53TG3             | 5p    |
| MspFrag1775   | 1  | 6285179   | 6285570   | 391 |          |                     |       |
| MspFrag145431 | 20 | 48273066  | 48273379  | 313 |          |                     |       |
| MspFrag149782 | 22 | 19034057  | 19034356  | 299 |          |                     |       |
| MspFrag149784 | 22 | 19035655  | 19035873  | 218 |          |                     |       |
| MspFrag2886   | 1  | 16695727  | 16696176  | 449 |          |                     |       |
| MspFrag38821  | 5  | 3156410   | 3156769   | 359 |          |                     |       |
| MspFrag4389   | 1  | 29281582  | 29281828  | 246 |          |                     |       |
| MspFrag77777  | 10 | 76836478  | 76837103  | 625 | 4959     | BC007494            | 5m    |
| MspFrag66146  | 8  | 144444026 | 144444368 | 342 | 602      | ZNF696              | 3p    |
| MspFrag44328  | 5  | 175956200 | 175956454 | 254 | 2692     | AK128878            | 5m    |
| MspFrag105101 | 15 | 22751446  | 22752129  | 683 | 219      | SNURF               | 5p    |
| MspFrag8168   | 1  | 108527701 | 108527992 | 291 |          |                     |       |
| MspFrag80954  | 10 | 131878295 | 131878616 | 321 |          |                     |       |
| MspFrag124610 | 17 | 63706209  | 63706660  | 451 | -89 -362 | BC080624 BC080624   | in in |
| MspFrag156275 | 23 | 71242026  | 71242406  | 380 | 147      | FLJ20105            | 5m    |
| MspFrag60966  | 8  | 1008907   | 1009401   | 494 |          |                     |       |

|               |    |           |           |     |      |          |    |
|---------------|----|-----------|-----------|-----|------|----------|----|
| MspFrag82654  | 11 | 2002464   | 2002798   | 334 |      |          |    |
| MspFrag147620 | 21 | 33327565  | 33327930  | 365 |      |          |    |
| MspFrag38491  | 5  | 1496943   | 1497332   | 389 | 1211 | SLC6A3   | 3m |
| MspFrag61161  | 8  | 2062616   | 2063197   | 581 |      |          |    |
| MspFrag96587  | 13 | 19666287  | 19666805  | 518 | 1250 | GJB2     | 5m |
| MspFrag1241   | 1  | 2871558   | 2871896   | 338 |      |          |    |
| MspFrag149788 | 22 | 19036660  | 19037337  | 677 |      |          |    |
| MspFrag20895  | 2  | 155380949 | 155381434 | 485 | 349  | KCNJ3    | 5p |
| MspFrag19245  | 2  | 108982952 | 108983175 | 223 |      |          |    |
| MspFrag55218  | 7  | 43062129  | 43062415  | 286 |      |          |    |
| MspFrag114206 | 16 | 33113440  | 33113764  | 324 | 357  | TP53TG3  | 5p |
| MspFrag17159  | 2  | 66264144  | 66264933  | 789 |      |          |    |
| MspFrag124844 | 17 | 69615375  | 69616058  | 683 |      |          |    |
| MspFrag14278  | 2  | 2676636   | 2677246   | 610 |      |          |    |
| MspFrag49687  | 6  | 101001787 | 101002201 | 414 |      |          |    |
| MspFrag133773 | 19 | 4999483   | 4999813   | 330 |      |          |    |
| MspFrag38714  | 5  | 2166920   | 2167677   | 757 |      |          |    |
| MspFrag139579 | 19 | 50974863  | 50975544  | 681 | 157  | DMPK     | 3m |
| MspFrag118491 | 17 | 3380201   | 3380549   | 348 |      |          |    |
| MspFrag1321   | 1  | 3103884   | 3104234   | 350 |      |          |    |
| MspFrag95754  | 12 | 127714235 | 127714816 | 581 |      |          |    |
| MspFrag66071  | 8  | 144225273 | 144225476 | 203 |      |          |    |
| MspFrag114219 | 16 | 33169975  | 33170299  | 324 | 357  | TP53TG3  | 5p |
| MspFrag14254  | 2  | 1833149   | 1833914   | 765 |      |          |    |
| MspFrag8273   | 1  | 109749595 | 109750084 | 489 | 817  | AK128798 | 5p |
| MspFrag118132 | 17 | 1425742   | 1425962   | 220 |      |          |    |
| MspFrag130315 | 18 | 74367316  | 74367647  | 331 |      |          |    |
| MspFrag14334  | 2  | 3326870   | 3327299   | 429 |      |          |    |
| MspFrag54975  | 7  | 35070796  | 35071213  | 417 | 4314 | TBX20    | 5m |
| MspFrag149792 | 22 | 19039098  | 19039826  | 728 |      |          |    |
| MspFrag757    | 1  | 1702806   | 1703222   | 416 | 1517 | CDC2L2   | 5m |
| MspFrag54400  | 7  | 26916475  | 26916913  | 438 | 841  | HOXA2    | 5m |
| MspFrag121238 | 17 | 31115713  | 31116237  | 524 |      |          |    |
| MspFrag4633   | 1  | 32374307  | 32374791  | 484 |      |          |    |
| MspFrag96227  | 12 | 131632939 | 131633353 | 414 |      |          |    |
| MspFrag1823   | 1  | 6445812   | 6446063   | 251 |      |          |    |
| MspFrag33338  | 4  | 15333834  | 15334201  | 367 | 552  | FBXL5    | 5m |
| MspFrag3084   | 1  | 18205071  | 18205589  | 518 |      |          |    |
| MspFrag10623  | 1  | 162330700 | 162331269 | 569 | 838  | MGST3    | 3p |
| MspFrag18856  | 2  | 100492801 | 100493089 | 288 | 192  | CHST10   | 5m |
| MspFrag21600  | 2  | 176773874 | 176774399 | 525 |      |          |    |
| MspFrag37395  | 4  | 187400622 | 187401021 | 399 |      |          |    |
| MspFrag71581  | 9  | 124112526 | 124112954 | 428 |      |          |    |
| MspFrag99668  | 13 | 112696646 | 112696951 | 305 |      |          |    |
| MspFrag15771  | 2  | 29699956  | 29700602  | 646 |      |          |    |
| MspFrag61169  | 8  | 2197099   | 2197693   | 594 |      |          |    |
| MspFrag140214 | 19 | 53833482  | 53834000  | 518 | 1082 | DBP      | 5m |
| MspFrag46721  | 6  | 27449907  | 27450504  | 597 | 2624 | AL833520 | 5m |
| MspFrag136002 | 19 | 16298270  | 16298496  | 226 | 1620 | KLF2     | 5p |
| MspFrag142017 | 19 | 63157706  | 63158406  | 700 |      |          |    |
| MspFrag143825 | 20 | 24569612  | 24570322  | 710 |      |          |    |
| MspFrag157076 | 23 | 117741123 | 117741602 | 479 | 1455 | ZCCHC12  | 5p |
| MspFrag14231  | 2  | 1703105   | 1703374   | 269 |      |          |    |
| MspFrag123393 | 17 | 45425386  | 45425933  | 547 | 1654 | DLX3     | 3m |
| MspFrag1377   | 1  | 3296147   | 3296524   | 377 |      |          |    |

|               |    |           |           |     |           |                    |       |
|---------------|----|-----------|-----------|-----|-----------|--------------------|-------|
| MspFrag118129 | 17 | 1424860   | 1425069   | 209 |           |                    |       |
| MspFrag14457  | 2  | 6749495   | 6749988   | 493 |           |                    |       |
| MspFrag50853  | 6  | 137860054 | 137860272 | 218 | 2830      | OLIG3              | 5m    |
| MspFrag76422  | 10 | 43464543  | 43465148  | 605 | 385       | ZNF32              | 5m    |
| MspFrag79207  | 10 | 102972749 | 102973047 | 298 |           |                    |       |
| MspFrag11782  | 1  | 202229373 | 202229833 | 460 | 1179      | BC040529           | 5p    |
| MspFrag27685  | 3  | 69517625  | 69517852  | 227 |           |                    |       |
| MspFrag152681 | 22 | 47331247  | 47331652  | 405 |           |                    |       |
| MspFrag54824  | 7  | 31149657  | 31149980  | 323 |           |                    |       |
| MspFrag105085 | 15 | 22223532  | 22223950  | 418 |           |                    |       |
| MspFrag62605  | 8  | 29266511  | 29267015  | 504 | 2407      | DUSP4              | 5m    |
| MspFrag99472  | 13 | 111623681 | 111623969 | 288 |           |                    |       |
| MspFrag71089  | 9  | 112919236 | 112919593 | 357 |           |                    |       |
| MspFrag120745 | 17 | 24917063  | 24917287  | 224 | 887 2577  | LOC116236 BC001593 | 3m 3p |
| MspFrag134495 | 19 | 8304633   | 8304844   | 211 |           |                    |       |
| MspFrag71120  | 9  | 112930124 | 112930481 | 357 |           |                    |       |
| MspFrag5190   | 1  | 37995046  | 37995631  | 585 | 722       | MTF1               | 5m    |
| MspFrag155418 | 23 | 47418801  | 47419138  | 337 |           |                    |       |
| MspFrag3535   | 1  | 22625307  | 22625790  | 483 |           |                    |       |
| MspFrag116223 | 16 | 74023655  | 74024439  | 784 | 421       | D85939             | 3m    |
| MspFrag55941  | 7  | 63786704  | 63787372  | 668 |           |                    |       |
| MspFrag56540  | 7  | 74018306  | 74018544  | 238 |           |                    |       |
| MspFrag123180 | 17 | 44159203  | 44159574  | 371 | 1510 4322 | HOXB13 PRAC        | 3m 5m |
| MspFrag127220 | 17 | 78629464  | 78629723  | 259 | 1132      | METRNL             | 3p    |
| MspFrag142557 | 20 | 1875786   | 1876205   | 419 |           |                    |       |
| MspFrag124893 | 17 | 69990739  | 69991183  | 444 |           |                    |       |
| MspFrag114108 | 16 | 32172825  | 32173259  | 434 | 681       | TP53TG3            | 5p    |
| MspFrag36661  | 4  | 154574444 | 154574685 | 241 |           |                    |       |
| MspFrag146589 | 20 | 61523181  | 61523518  | 337 |           |                    |       |
| MspFrag52666  | 7  | 989299    | 989808    | 509 |           |                    |       |
| MspFrag22036  | 2  | 191710645 | 191710851 | 206 |           |                    |       |
| MspFrag144826 | 20 | 39792506  | 39792745  | 239 |           |                    |       |
| MspFrag145238 | 20 | 44977062  | 44977342  | 280 |           |                    |       |
| MspFrag11474  | 1  | 197984459 | 197984775 | 316 | 223       | PKP1               | 5p    |
| MspFrag148458 | 21 | 43964947  | 43965429  | 482 | 1527      | PDXK               | 5p    |
| MspFrag133397 | 19 | 3884765   | 3885169   | 404 | 169       | ITGB1BP3           | 5p    |
| MspFrag1249   | 1  | 2944491   | 2945100   | 609 |           |                    |       |
| MspFrag56504  | 7  | 73646860  | 73647098  | 238 |           |                    |       |
| MspFrag120286 | 17 | 19588958  | 19589326  | 368 |           |                    |       |
| MspFrag84518  | 11 | 44286856  | 44287176  | 320 | 1116      | ALX4               | 3m    |
| MspFrag32174  | 4  | 1719620   | 1719949   | 329 |           |                    |       |
| MspFrag64725  | 8  | 98359395  | 98359772  | 377 | 43        | TSPYL5             | 5m    |
| MspFrag152736 | 22 | 48119202  | 48119610  | 408 |           |                    |       |
| MspFrag39543  | 5  | 33972064  | 33972687  | 623 | -440 -183 | RLN3R1 RLN3R1      | in in |
| MspFrag52146  | 6  | 169670215 | 169670603 | 388 |           |                    |       |
| MspFrag87210  | 11 | 70329201  | 70329876  | 675 |           |                    |       |
| MspFrag38910  | 5  | 3907742   | 3907967   | 225 |           |                    |       |
| MspFrag55611  | 7  | 54506521  | 54507157  | 636 |           |                    |       |
| MspFrag114804 | 16 | 52881971  | 52882449  | 478 | 4092      | IRX3               | 5m    |
| MspFrag25187  | 3  | 15081919  | 15082508  | 589 | 99        | MRPS25             | 5m    |
| MspFrag146021 | 20 | 59404205  | 59404898  | 693 |           |                    |       |
| MspFrag130261 | 18 | 73091680  | 73092166  | 486 | 960       | GALR1              | 5p    |
| MspFrag17841  | 2  | 74642481  | 74642761  | 280 | 383       | LBX2               | 5m    |
| MspFrag52434  | 7  | 580841    | 581190    | 349 |           |                    |       |
| MspFrag136153 | 19 | 17263933  | 17264231  | 298 |           |                    |       |



|               |    |           |           |     |      |           |    |
|---------------|----|-----------|-----------|-----|------|-----------|----|
| MspFrag110848 | 16 | 1408921   | 1409435   | 514 | 4223 | BC011924  | 5m |
| MspFrag135107 | 19 | 11354200  | 11354601  | 401 | 1325 | EPOR      | 3m |
| MspFrag57206  | 7  | 97246402  | 97246843  | 441 | 113  | BC062733  | 5m |
| MspFrag90376  | 12 | 6626277   | 6626591   | 314 | 250  | ACRBP     | 3m |
| MspFrag105266 | 15 | 26323073  | 26323406  | 333 |      |           |    |
| MspFrag137207 | 19 | 35627974  | 35628220  | 246 |      |           |    |
| MspFrag135257 | 19 | 12746871  | 12747166  | 295 | 171  | HOOK2     | 3m |
| MspFrag5644   | 1  | 41941498  | 41941965  | 467 |      |           |    |
| MspFrag30803  | 3  | 185784594 | 185784860 | 266 |      |           |    |
| MspFrag138677 | 19 | 45593831  | 45594133  | 302 |      |           |    |
| MspFrag123151 | 17 | 44073827  | 44074263  | 436 |      |           |    |
| MspFrag9273   | 1  | 146010092 | 146010549 | 457 |      |           |    |
| MspFrag134826 | 19 | 10264682  | 10265092  | 410 |      |           |    |
| MspFrag145015 | 20 | 43424513  | 43425108  | 595 | 6    | C20orf35  | 3p |
| MspFrag6914   | 1  | 62496120  | 62496646  | 526 | 347  | AK091941  | 3m |
| MspFrag104955 | 15 | 19487742  | 19488254  | 512 |      |           |    |
| MspFrag26133  | 3  | 44016018  | 44016419  | 401 |      |           |    |
| MspFrag39760  | 5  | 40871578  | 40871991  | 413 | 434  | RPL37     | 5m |
| MspFrag152716 | 22 | 47821576  | 47822084  | 508 |      |           |    |
| MspFrag158624 | 23 | 154810057 | 154810810 | 753 | 2860 | AY217347  | 3p |
| MspFrag101138 | 14 | 44792484  | 44793174  | 690 | 338  | C14orf106 | 5m |
| MspFrag149787 | 22 | 19036333  | 19036659  | 326 |      |           |    |
| MspFrag93471  | 12 | 76221553  | 76221851  | 298 |      |           |    |
| MspFrag156308 | 23 | 72081592  | 72082087  | 495 | 285  | LOC340529 | 3m |
| MspFrag67369  | 9  | 988973    | 989201    | 228 |      |           |    |
| MspFrag144226 | 20 | 31770902  | 31771540  | 638 | 224  | PXMP4     | 3m |
| MspFrag14487  | 2  | 7440522   | 7441007   | 485 |      |           |    |
| MspFrag48491  | 6  | 44373563  | 44374341  | 778 | 160  | MGC33600  | 5m |
| MspFrag80728  | 10 | 128234723 | 128235166 | 443 |      |           |    |
| MspFrag152480 | 22 | 45091310  | 45091573  | 263 |      |           |    |
| MspFrag36683  | 4  | 154962375 | 154962925 | 550 | 3745 | TLR2      | 3p |
| MspFrag55475  | 7  | 47902671  | 47903123  | 452 | 459  | UPP1      | 5p |
| MspFrag89408  | 11 | 126267744 | 126268359 | 615 |      |           |    |
| MspFrag10490  | 1  | 158246841 | 158247086 | 245 |      |           |    |
| MspFrag71074  | 9  | 112913792 | 112914149 | 357 |      |           |    |
| MspFrag99113  | 13 | 102224202 | 102224673 | 471 | 59   | LOC93081  | 5m |
| MspFrag158958 | 24 | 1628781   | 1629129   | 348 |      |           |    |
| MspFrag94345  | 12 | 108603802 | 108604232 | 430 |      |           |    |
| MspFrag125612 | 17 | 73648109  | 73648558  | 449 |      |           |    |
| MspFrag45409  | 6  | 1530339   | 1531041   | 702 |      |           |    |
| MspFrag148624 | 21 | 44930972  | 44931714  | 742 | 4466 | KRTAP12-1 | 5m |
| MspFrag110494 | 16 | 807095    | 807318    | 223 |      |           |    |
| MspFrag143616 | 20 | 21441106  | 21441427  | 321 | 1237 | NKX2-2    | 3m |
| MspFrag144360 | 20 | 33144476  | 33145268  | 792 | 197  | TRPC4AP   | 5m |
| MspFrag7116   | 1  | 65646887  | 65647674  | 787 |      |           |    |
| MspFrag60779  | 7  | 158289060 | 158289297 | 237 |      |           |    |
| MspFrag88982  | 11 | 118710713 | 118711261 | 548 | 267  | RNF26     | 5p |
| MspFrag145647 | 20 | 54635914  | 54636293  | 379 | 1471 | TFAP2C    | 3p |
| MspFrag153563 | 23 | 407042    | 407560    | 518 |      |           |    |
| MspFrag8778   | 1  | 116868496 | 116868706 | 210 |      |           |    |
| MspFrag32624  | 4  | 3776452   | 3776818   | 366 |      |           |    |
| MspFrag46110  | 6  | 11152853  | 11153148  | 295 | 290  | ELOVL2    | 5m |
| MspFrag8710   | 1  | 115926101 | 115926763 | 662 |      |           |    |
| MspFrag33006  | 4  | 7629573   | 7630026   | 453 |      |           |    |
| MspFrag110793 | 16 | 1333585   | 1333929   | 344 |      |           |    |

|               |    |           |           |     |           |                   |       |
|---------------|----|-----------|-----------|-----|-----------|-------------------|-------|
| MspFrag42983  | 5  | 140216007 | 140216482 | 475 | 190       | PCDHA10           | 5p    |
| MspFrag47510  | 6  | 33708897  | 33709149  | 252 |           |                   |       |
| MspFrag61173  | 8  | 2324899   | 2325526   | 627 |           |                   |       |
| MspFrag87185  | 11 | 69863028  | 69863693  | 665 |           |                   |       |
| MspFrag123890 | 17 | 54187494  | 54188029  | 535 | 201       | PPM1E             | 3p    |
| MspFrag4819   | 1  | 33768108  | 33768404  | 296 |           |                   |       |
| MspFrag88235  | 11 | 95551592  | 95552011  | 419 |           |                   |       |
| MspFrag132131 | 19 | 1454713   | 1455193   | 480 |           |                   |       |
| MspFrag31913  | 4  | 1192879   | 1193371   | 492 |           |                   |       |
| MspFrag99310  | 13 | 109676095 | 109676754 | 659 |           |                   |       |
| MspFrag26073  | 3  | 42996257  | 42996879  | 622 |           |                   |       |
| MspFrag99150  | 13 | 104803836 | 104804393 | 557 |           |                   |       |
| MspFrag115251 | 16 | 65017842  | 65018293  | 451 |           |                   |       |
| MspFrag149790 | 22 | 19038177  | 19038476  | 299 |           |                   |       |
| MspFrag71121  | 9  | 112930955 | 112931497 | 542 |           |                   |       |
| MspFrag96210  | 12 | 131593486 | 131593921 | 435 |           |                   |       |
| MspFrag76120  | 10 | 35968545  | 35968856  | 311 | 1512      | FZD8              | 3m    |
| MspFrag122729 | 17 | 41181205  | 41181664  | 459 |           |                   |       |
| MspFrag25164  | 3  | 14826516  | 14826916  | 400 |           |                   |       |
| MspFrag92533  | 12 | 52831831  | 52832592  | 761 |           |                   |       |
| MspFrag145066 | 20 | 43896344  | 43897081  | 737 | 85        | AK095851          | 5p    |
| MspFrag10393  | 1  | 158225523 | 158225819 | 296 |           |                   |       |
| MspFrag92520  | 12 | 52761839  | 52762613  | 774 |           |                   |       |
| MspFrag156306 | 23 | 72006660  | 72007155  | 495 | 284       | BC041956          | 5p    |
| MspFrag1324   | 1  | 3113132   | 3113448   | 316 |           |                   |       |
| MspFrag1326   | 1  | 3118212   | 3118636   | 424 |           |                   |       |
| MspFrag14290  | 2  | 2825618   | 2826147   | 529 |           |                   |       |
| MspFrag71105  | 9  | 112925509 | 112926053 | 544 |           |                   |       |
| MspFrag151442 | 22 | 37421867  | 37422481  | 614 | 3987 1098 | BC014075 KIAA0063 | 3p 5m |
| MspFrag9703   | 1  | 150968906 | 150969531 | 625 | 149       | BX648485          | 5m    |
| MspFrag44192  | 5  | 174111126 | 174111339 | 213 |           |                   |       |
| MspFrag124831 | 17 | 69408959  | 69409615  | 656 |           |                   |       |
| MspFrag127669 | 18 | 7278710   | 7279418   | 708 |           |                   |       |
| MspFrag9928   | 1  | 152077757 | 152078037 | 280 |           |                   |       |
| MspFrag131108 | 19 | 562513    | 563000    | 487 |           |                   |       |
| MspFrag2123   | 1  | 9031495   | 9031958   | 463 |           |                   |       |
| MspFrag15066  | 2  | 20312835  | 20313215  | 380 |           |                   |       |
| MspFrag20024  | 2  | 122816085 | 122816353 | 268 |           |                   |       |
| MspFrag63271  | 8  | 49810071  | 49810539  | 468 | -195 -273 | FLJ11767 FLJ11767 | in in |
| MspFrag145848 | 20 | 56850090  | 56850439  | 349 | 1901      | GNAS              | 5p    |
| MspFrag40858  | 5  | 77304521  | 77304932  | 411 |           |                   |       |
| MspFrag138910 | 19 | 46878438  | 46879162  | 724 |           |                   |       |
| MspFrag152094 | 22 | 41917375  | 41918092  | 717 | 1677      | AK055463          | 3m    |
| MspFrag40505  | 5  | 71888649  | 71889360  | 711 |           |                   |       |
| MspFrag99457  | 13 | 111003520 | 111003741 | 221 |           |                   |       |
| MspFrag100061 | 14 | 18719759  | 18720152  | 393 | -116 -277 | BX248778 BX248778 | in in |
| MspFrag10537  | 1  | 158307786 | 158308067 | 281 | 696       | HSPA6             | 5p    |
| MspFrag27268  | 3  | 55492383  | 55492977  | 594 |           |                   |       |
| MspFrag145717 | 20 | 55399273  | 55399609  | 336 | 1915 498  | AK096426 RNPC1    | 3m 3p |
| MspFrag89865  | 12 | 440326    | 440703    | 377 | 523       | B4GalNac-T3       | 5p    |
| MspFrag20134  | 2  | 128138182 | 128138536 | 354 | -193 -161 | LIMS2 LIMS2       | in in |
| MspFrag72003  | 9  | 127768596 | 127769001 | 405 | 323       | PIP5KL1           | 3m    |
| MspFrag148771 | 21 | 45568987  | 45569301  | 314 |           |                   |       |
| MspFrag149461 | 22 | 17536199  | 17536687  | 488 |           |                   |       |
| MspFrag54424  | 7  | 26935561  | 26936019  | 458 |           |                   |       |

|               |    |           |           |     |         |               |       |
|---------------|----|-----------|-----------|-----|---------|---------------|-------|
| MspFrag72461  | 9  | 130337856 | 130338298 | 442 |         |               |       |
| MspFrag141334 | 19 | 60185911  | 60186130  | 219 |         |               |       |
| MspFrag26774  | 3  | 50133302  | 50133713  | 411 |         |               |       |
| MspFrag71216  | 9  | 114346043 | 114346380 | 337 | 424     | AB040959      | 3m    |
| MspFrag15478  | 2  | 26785546  | 26785870  | 324 |         |               |       |
| MspFrag138344 | 19 | 43973696  | 43974028  | 332 |         |               |       |
| MspFrag82920  | 11 | 3199023   | 3199589   | 566 |         |               |       |
| MspFrag146294 | 20 | 60809849  | 60810182  | 333 | 451     | NTSR1         | 3p    |
| MspFrag18355  | 2  | 91199543  | 91199793  | 250 |         |               |       |
| MspFrag118488 | 17 | 3262975   | 3263712   | 737 |         |               |       |
| MspFrag142458 | 20 | 773559    | 773845    | 286 | 241     | C20orf55      | 5p    |
| MspFrag28887  | 3  | 128424361 | 128424622 | 261 |         |               |       |
| MspFrag153027 | 22 | 48991342  | 48991874  | 532 | 44 2001 | HDAC10 HDAC10 | 3m 5m |
| MspFrag155823 | 23 | 52912797  | 52913213  | 416 |         |               |       |
| MspFrag10421  | 1  | 158232050 | 158232295 | 245 |         |               |       |
| MspFrag89444  | 11 | 128007477 | 128008054 | 577 |         |               |       |
| MspFrag132416 | 19 | 1856758   | 1857148   | 390 | 342     | LOC113179     | 5p    |
| MspFrag149785 | 22 | 19035874  | 19036170  | 296 |         |               |       |
| MspFrag58680  | 7  | 128125215 | 128125598 | 383 |         |               |       |
| MspFrag44767  | 5  | 178348383 | 178348602 | 219 |         |               |       |
| MspFrag75026  | 10 | 11420347  | 11420872  | 525 |         |               |       |
| MspFrag1339   | 1  | 3163795   | 3164122   | 327 |         |               |       |
| MspFrag130161 | 18 | 72334956  | 72335293  | 337 |         |               |       |
| MspFrag146425 | 20 | 61188038  | 61188341  | 303 |         |               |       |
| MspFrag14451  | 2  | 5957756   | 5957971   | 215 |         |               |       |
| MspFrag63597  | 8  | 59220858  | 59221324  | 466 |         |               |       |
| MspFrag90004  | 12 | 1887654   | 1887972   | 318 |         |               |       |
| MspFrag95724  | 12 | 126397709 | 126398319 | 610 |         |               |       |
| MspFrag122371 | 17 | 39446974  | 39447439  | 465 | 432     | MGC4251       | 3m    |
| MspFrag154875 | 23 | 39303900  | 39304278  | 378 |         |               |       |
| MspFrag1534   | 1  | 3642624   | 3643184   | 560 |         |               |       |
| MspFrag123955 | 17 | 55397186  | 55397616  | 430 | 309     | LOC51136      | 5m    |
| MspFrag133709 | 19 | 4736010   | 4736531   | 521 |         |               |       |
| MspFrag134595 | 19 | 8566758   | 8567128   | 370 |         |               |       |
| MspFrag123786 | 17 | 53294503  | 53294919  | 416 |         |               |       |
| MspFrag144856 | 20 | 41569277  | 41569661  | 384 |         |               |       |
| MspFrag27379  | 3  | 58042487  | 58042945  | 458 |         |               |       |
| MspFrag50717  | 6  | 134539380 | 134539767 | 387 | 1685    | SGK           | 5m    |
| MspFrag56289  | 7  | 72093180  | 72093418  | 238 |         |               |       |
| MspFrag17091  | 2  | 65021553  | 65022078  | 525 |         |               |       |
| MspFrag24273  | 2  | 241696154 | 241696568 | 414 |         |               |       |
| MspFrag60445  | 7  | 156703792 | 156704149 | 357 |         |               |       |
| MspFrag73062  | 9  | 134431953 | 134432427 | 474 |         |               |       |
| MspFrag83839  | 11 | 19323892  | 19324489  | 597 | 4357    | AB063115      | 3p    |
| MspFrag88395  | 11 | 106833824 | 106834052 | 228 | 3418    | CWF19L2       | 5m    |
| MspFrag142439 | 20 | 648609    | 649321    | 712 |         |               |       |
| MspFrag3066   | 1  | 18043936  | 18044316  | 380 |         |               |       |
| MspFrag72740  | 9  | 132391939 | 132392575 | 636 |         |               |       |
| MspFrag124400 | 17 | 60205707  | 60206091  | 384 | 1993    | BC032382      | 3m    |
| MspFrag68970  | 9  | 64167952  | 64168281  | 329 | 3921    | AK130933      | 5m    |
| MspFrag143733 | 20 | 22976137  | 22976617  | 480 | 1684    | THBD          | 3m    |
| MspFrag25517  | 3  | 28529966  | 28530450  | 484 |         |               |       |
| MspFrag94051  | 12 | 103034912 | 103035336 | 424 | 405     | NFYB          | 5m    |
| MspFrag147887 | 21 | 36990800  | 36991207  | 407 | 2653    | SIM2          | 3p    |
| MspFrag87160  | 11 | 69602771  | 69603307  | 536 | 478     | TMEM16A       | 5p    |



Supplemental Table 3

3m = Gene is 3' to frag on min Str; 5m = Gene is 5' to frag on min Str; 3p = Gene is 3' to frag on plus Str; 5p= Gene is 5' to frag;in=frag overlapping tss

| Frag_ID       | Chr Nam | Start     | End       | FragLen | Tval       | AdjpVal    | Dist_to_TSS | GeneName          | Fragment Orientation |
|---------------|---------|-----------|-----------|---------|------------|------------|-------------|-------------------|----------------------|
| MspFrag129193 | 18      | 44375040  | 44375381  | 341     | -12.66092  | 1.78E-12   |             |                   |                      |
| MspFrag152494 | 22      | 45250387  | 45250713  | 326     | -14.581252 | 1.78E-12   |             |                   |                      |
| MspFrag87210  | 11      | 70329201  | 70329876  | 675     | -8.9413343 | 8.15E-08   |             |                   |                      |
| MspFrag757    | 1       | 1702806   | 1703222   | 416     | -9.2946194 | 8.15E-08   | 1517        | CDC2L2            | 5m                   |
| MspFrag98726  | 13      | 94162072  | 94162292  | 220     | 8.55190178 | 1.35E-07   | 98          | SOX21             | 3m                   |
| MspFrag139351 | 19      | 50271612  | 50272349  | 737     | -8.046217  | 5.02E-07   | 2020 84     | GEMIN7 ZNF342     | 3p 5m                |
| MspFrag118132 | 17      | 1425742   | 1425962   | 220     | 8.73654317 | 5.02E-07   |             |                   |                      |
| MspFrag6016   | 1       | 45461980  | 45462176  | 196     | 7.95755509 | 7.23E-07   | 343         | MGC15668          | 5p                   |
| MspFrag145431 | 20      | 48273066  | 48273379  | 313     | -7.999459  | 7.44E-07   |             |                   |                      |
| MspFrag86939  | 11      | 67937373  | 67937857  | 484     | -7.6336584 | 1.60E-06   |             |                   |                      |
| MspFrag7691   | 1       | 90895271  | 90895481  | 210     | 7.48648602 | 3.25E-06   | 456         | BARHL2            | 5m                   |
| MspFrag152496 | 22      | 45250831  | 45251397  | 566     | -8.3415525 | 4.43E-06   |             |                   |                      |
| MspFrag14944  | 2       | 16104585  | 16104786  | 201     | 7.81697659 | 6.74E-06   |             |                   |                      |
| MspFrag144740 | 20      | 38745548  | 38745742  | 194     | 7.17884573 | 7.23E-06   |             |                   |                      |
| MspFrag18059  | 2       | 85273730  | 85273951  | 221     | 7.15374262 | 7.23E-06   | 1339        | TCF7L1            | 5p                   |
| MspFrag148218 | 21      | 42301580  | 42302373  | 793     | 7.14671078 | 7.23E-06   | 1146        | ZNF295            | 3m                   |
| MspFrag110545 | 16      | 954593    | 954879    | 286     | 7.56760371 | 7.87E-06   | 108         | AK127296          | 3p                   |
| MspFrag143616 | 20      | 21441106  | 21441427  | 321     | 7.05512498 | 9.54E-06   | 1237        | NKX2-2            | 3m                   |
| MspFrag47714  | 6       | 35573895  | 35574154  | 259     | 7.05993354 | 1.12E-05   | 1131        | BC091488          | 5m                   |
| MspFrag32396  | 4       | 2385562   | 2385837   | 275     | 6.95797887 | 1.27E-05   | 1730 2094   | BC053664 AK126028 | 3m 3p                |
| MspFrag150179 | 22      | 21848931  | 21849327  | 396     | 6.93965493 | 1.30E-05   | 1679        | BCR               | 5p                   |
| MspFrag137259 | 19      | 37587543  | 37587933  | 390     | 6.99469255 | 1.59E-05   | 602         | MGC35440          | 3p                   |
| MspFrag135107 | 19      | 11354200  | 11354601  | 401     | 7.16947866 | 1.59E-05   | 1325        | EPOR              | 3m                   |
| MspFrag1006   | 1       | 2254380   | 2254651   | 271     | 6.88268099 | 1.59E-05   |             |                   |                      |
| MspFrag118129 | 17      | 1424860   | 1425069   | 209     | 7.06707398 | 1.59E-05   |             |                   |                      |
| MspFrag37175  | 4       | 184394041 | 184394343 | 302     | 6.90979775 | 2.75E-05   | 1158        | FLJ30277          | 3m                   |
| MspFrag112884 | 16      | 19802449  | 19802692  | 243     | 6.67803808 | 3.04E-05   | 923         | AF202640          | 3m                   |
| MspFrag153683 | 23      | 1699882   | 1700349   | 467     | 6.90665132 | 3.53E-05   | 55          | P2RY8             | 5m                   |
| MspFrag133059 | 19      | 3129912   | 3130238   | 326     | 6.60100158 | 3.75E-05   | 143         | EDG6              | 5p                   |
| MspFrag39820  | 5       | 43054155  | 43054431  | 276     | 6.71989496 | 3.75E-05   |             |                   |                      |
| MspFrag158962 | 24      | 1699882   | 1700349   | 467     | 6.71989496 | 3.75E-05   | 55          | P2RY8             | 5m                   |
| MspFrag9601   | 1       | 148893238 | 148893494 | 256     | 6.54614298 | 4.43E-05   |             |                   |                      |
| MspFrag42758  | 5       | 139061084 | 139061343 | 259     | 6.7594011  | 4.94E-05   |             |                   |                      |
| MspFrag33166  | 4       | 10134318  | 10134625  | 307     | 6.62605696 | 4.96E-05   | 676         | KIAA1729          | 3m                   |
| MspFrag99448  | 13      | 110869367 | 110869933 | 566     | -6.5012869 | 4.96E-05   |             |                   |                      |
| MspFrag50127  | 6       | 110903852 | 110904168 | 316     | 6.51796192 | 5.18E-05   | -68 -248    | AB055798 AB055798 | in in                |
| MspFrag136153 | 19      | 17263933  | 17264231  | 298     | 6.47005124 | 5.24E-05   |             |                   |                      |
| MspFrag27766  | 3       | 71917271  | 71917515  | 244     | 6.51164619 | 5.24E-05   | 369         | PROK2             | 5m                   |
| MspFrag24640  | 3       | 4999761   | 5000008   | 247     | -7.0320715 | 5.91E-05   |             |                   |                      |
| MspFrag58107  | 7       | 107237876 | 107238366 | 490     | 7.17634622 | 6.49E-05   | 121         | LAMB1             | 5m                   |
| MspFrag145717 | 20      | 55399273  | 55399609  | 336     | 6.38659785 | 6.57E-05   | 1915 498    | AK096426 RNPC1    | 3m 3p                |
| MspFrag84490  | 11      | 43921200  | 43921449  | 249     | 6.57648543 | 6.97E-05   |             |                   |                      |
| MspFrag67267  | 9       | 108067    | 108157    | 90      | 6.42504471 | 7.38E-05   | 260         | FOXD4             | 3m                   |
| MspFrag15612  | 2       | 27441499  | 27441731  | 232     | 6.42981727 | 7.58E-05   | 1050        | UCN               | 3m                   |
| MspFrag23031  | 2       | 220260177 | 220260432 | 255     | 6.49364881 | 7.58E-05   | 2026 4632   | INHA BC061909     | 3p 5m                |
| MspFrag108228 | 15      | 74417574  | 74417854  | 280     | 6.46427609 | 7.58E-05   | 1373        | ISL2              | 5p                   |
| MspFrag112427 | 16      | 11670642  | 11671019  | 377     | 6.33748902 | 7.58E-05   | 825         | SNN               | 5p                   |
| MspFrag55649  | 7       | 54862496  | 54862960  | 464     | 6.3417272  | 8.64E-05   | 1477        | EGFR              | 5p                   |
| MspFrag44183  | 5       | 174092185 | 174092511 | 326     | 6.35596207 | 9.51E-05   |             |                   |                      |
| MspFrag7228   | 1       | 71223914  | 71224499  | 585     | -6.3261814 | 9.51E-05   | 782         | AY387856          | 3m                   |
| MspFrag45815  | 6       | 5951907   | 5952078   | 171     | 6.25632515 | 9.51E-05   | 554         | NRN1              | 3m                   |
| MspFrag42845  | 5       | 139505855 | 139506132 | 277     | 6.23944171 | 9.51E-05   |             |                   |                      |
| MspFrag121357 | 17      | 32152841  | 32153219  | 378     | 6.25753564 | 9.62E-05   |             |                   |                      |
| MspFrag73544  | 9       | 136826968 | 136827269 | 301     | 6.37475679 | 9.62E-05   |             |                   |                      |
| MspFrag108348 | 15      | 76073603  | 76074094  | 491     | 6.22560604 | 9.93E-05   |             |                   |                      |
| MspFrag156280 | 23      | 71280186  | 71280567  | 381     | 6.12946931 | 0.00014843 | 24          | RPS4X             | 5m                   |
| MspFrag121238 | 17      | 31115713  | 31116237  | 524     | 6.10624078 | 0.00015    |             |                   |                      |
| MspFrag121388 | 17      | 32369164  | 32369341  | 177     | 6.09910104 | 0.0001519  | 553         | LHX1              | 5p                   |
| MspFrag139877 | 19      | 52423278  | 52423401  | 123     | 6.09910104 | 0.0001519  |             |                   |                      |
| MspFrag27178  | 3       | 53251781  | 53252361  | 580     | 6.28115583 | 0.00017029 |             |                   |                      |

|               |    |           |           |      |            |            |          |                |       |
|---------------|----|-----------|-----------|------|------------|------------|----------|----------------|-------|
| MspFrag46665  | 6  | 26659036  | 26659479  | 443  | 6.05346799 | 0.00017477 |          |                |       |
| MspFrag46871  | 6  | 29799922  | 29800350  | 428  | 6.12037799 | 0.0001751  | 3965 703 | AF336880 HLA-F | 5m 5p |
| MspFrag23828  | 2  | 236859930 | 236860222 | 292  | 6.1047736  | 0.00018152 | 1278     | GBX2           | 5m    |
| MspFrag96587  | 13 | 19666287  | 19666805  | 518  | 6.0826481  | 0.00018152 | 1250     | GJB2           | 5m    |
| MspFrag34291  | 4  | 54808793  | 54808976  | 183  | 6.03823966 | 0.00018475 | 1376     | BC075090       | 5p    |
| MspFrag121804 | 17 | 35116206  | 35116775  | 569  | 6.2309878  | 0.00018934 | 407      | AK131568       | 3p    |
| MspFrag154904 | 23 | 39622239  | 39622698  | 459  | 6.04593435 | 0.00018934 |          |                |       |
| MspFrag99554  | 13 | 111836670 | 111837162 | 492  | -6.561067  | 0.00018934 |          |                |       |
| MspFrag56504  | 7  | 73646860  | 73647098  | 238  | 6.00545956 | 0.00018934 |          |                |       |
| MspFrag120436 | 17 | 21280786  | 21281169  | 383  | -6.0042514 | 0.0001896  |          |                |       |
| MspFrag23666  | 2  | 233750306 | 233750664 | 358  | 6.12432575 | 0.00020263 |          |                |       |
| MspFrag157649 | 23 | 133850525 | 133852242 | 1717 | 5.92703574 | 0.00024552 |          |                |       |
| MspFrag57206  | 7  | 97246402  | 97246843  | 441  | 6.42680203 | 0.00026355 | 113      | BC062733       | 5m    |
| MspFrag128296 | 18 | 18001222  | 18001612  | 390  | 5.89961255 | 0.00026355 | 1789     | GATA6          | 3p    |
| MspFrag79690  | 10 | 111756970 | 111757328 | 358  | 6.16656337 | 0.00026355 | 372 1182 | ADD3 U92992    | 3p 5m |
| MspFrag135426 | 19 | 13070156  | 13070547  | 391  | 6.16656337 | 0.00026355 |          |                |       |
| MspFrag113196 | 16 | 25176405  | 25176458  | 53   | 5.91525862 | 0.00026624 | 49       | AK131342       | 5m    |
| MspFrag40830  | 5  | 76972120  | 76972386  | 266  | 5.88922031 | 0.00028908 | 1842     | OTP            | 5m    |
| MspFrag19592  | 2  | 113973011 | 113973114 | 103  | 5.87607731 | 0.0003185  | 121      | FOXDL1         | 5p    |
| MspFrag37125  | 4  | 183438608 | 183439003 | 395  | 5.85296207 | 0.0003185  | 1765     | MGC45800       | 3m    |
| MspFrag70483  | 9  | 97827227  | 97827750  | 523  | 5.99338087 | 0.00033431 |          |                |       |
| MspFrag12306  | 1  | 217348132 | 217348559 | 427  | 6.02402877 | 0.00035883 | 90       | AK094105       | 3p    |
| MspFrag45427  | 6  | 1550884   | 1551417   | 533  | 6.05662824 | 0.00035883 | 4262     | FOXC1          | 3p    |
| MspFrag35857  | 4  | 120579420 | 120580037 | 617  | 5.90458807 | 0.00035883 | 30       | LOC401152      | 5m    |
| MspFrag65733  | 8  | 140784926 | 140785162 | 236  | 5.83480876 | 0.00035883 | 445      | KCNK9          | 5m    |
| MspFrag103365 | 14 | 94304438  | 94304628  | 190  | 5.83480876 | 0.00035883 | 1624     | GSC            | 3m    |
| MspFrag149824 | 22 | 19109258  | 19109530  | 272  | 5.94524948 | 0.0003604  |          |                |       |
| MspFrag36661  | 4  | 154574444 | 154574685 | 241  | 6.23895674 | 0.00036533 |          |                |       |
| MspFrag87104  | 11 | 69228784  | 69229108  | 324  | 5.75257462 | 0.00038906 | 497      | FGF19          | 5m    |
| MspFrag92494  | 12 | 52711286  | 52711494  | 208  | 5.79273979 | 0.00038906 | 1604     | HOXC5          | 3p    |
| MspFrag142973 | 20 | 4751702   | 4751750   | 48   | 5.7469445  | 0.00038906 | 541      | RASSF2         | 3m    |
| MspFrag1359   | 1  | 3218362   | 3218653   | 291  | -5.7729094 | 0.00038906 |          |                |       |
| MspFrag156206 | 23 | 70495018  | 70495368  | 350  | 6.13889289 | 0.00038906 | -48 -302 | INGX INGX      | in in |
| MspFrag25863  | 3  | 38665319  | 38665643  | 324  | 5.75515029 | 0.00038906 | 524      | SCN5A          | 3m    |
| MspFrag24086  | 2  | 239889915 | 239889984 | 69   | 5.75788886 | 0.00038906 |          |                |       |
| MspFrag137416 | 19 | 38555554  | 38556118  | 564  | 5.92289675 | 0.00038906 | 330      | CEBPG          | 3p    |
| MspFrag12740  | 1  | 224553581 | 224553811 | 230  | 5.75434573 | 0.00038906 |          |                |       |
| MspFrag126464 | 17 | 77042417  | 77042630  | 213  | 5.78598903 | 0.00039966 | 911      | BC033222       | 3p    |
| MspFrag45434  | 6  | 1553849   | 1554060   | 211  | 5.73871253 | 0.00039966 | 1619     | FOXC1          | 3p    |
| MspFrag40832  | 5  | 76972458  | 76972694  | 236  | 5.7333755  | 0.00039966 | 2180     | OTP            | 5m    |
| MspFrag63886  | 8  | 68036920  | 68037223  | 303  | 5.71834103 | 0.00039966 |          |                |       |
| MspFrag92797  | 12 | 55918827  | 55919027  | 200  | 5.71184458 | 0.00041005 | 1715     | LOC56901       | 3m    |
| MspFrag126250 | 17 | 76640528  | 76640855  | 327  | 6.18582542 | 0.00041005 |          |                |       |
| MspFrag121443 | 17 | 32924118  | 32924175  | 57   | 5.76218847 | 0.00041005 | 1507     | DUSP14         | 3p    |
| MspFrag155045 | 23 | 39762461  | 39762898  | 437  | 5.7368312  | 0.00042045 |          |                |       |
| MspFrag40505  | 5  | 71888649  | 71889360  | 711  | 5.69391172 | 0.00042417 |          |                |       |
| MspFrag76289  | 10 | 42681822  | 42682183  | 361  | 5.77488442 | 0.00044473 |          |                |       |
| MspFrag117324 | 16 | 87309221  | 87309385  | 164  | -5.7748844 | 0.00044473 | 3138     | AK097851       | 3p    |
| MspFrag21607  | 2  | 176778270 | 176778531 | 261  | 5.76152406 | 0.0004474  | 4507     | HOXD13         | 3p    |
| MspFrag140472 | 19 | 54722662  | 54722870  | 208  | 5.71668865 | 0.00046579 | -184 -24 | RCN3 RCN3      | in in |
| MspFrag39810  | 5  | 43030412  | 43030691  | 279  | 5.65293723 | 0.00048476 |          |                |       |
| MspFrag18820  | 2  | 99565014  | 99565065  | 51   | 5.85639933 | 0.00054445 | 16       | REV1L          | 5m    |
| MspFrag120532 | 17 | 23578566  | 23578712  | 146  | 5.66101516 | 0.00054859 | 600      | PYY2           | 5p    |
| MspFrag143080 | 20 | 6698850   | 6699041   | 191  | 5.66101516 | 0.00054859 | 1644     | BMP2           | 5p    |
| MspFrag142940 | 20 | 4150615   | 4151066   | 451  | 5.62811019 | 0.00055376 |          |                |       |
| MspFrag41176  | 5  | 92939958  | 92940583  | 625  | 5.6794876  | 0.00055476 | 4215     | NR2F1          | 3p    |
| MspFrag70052  | 9  | 93795167  | 93795514  | 347  | 5.59883058 | 0.00055476 | 1694     | BC064363       | 3m    |
| MspFrag19403  | 2  | 111592239 | 111592479 | 240  | 5.59201226 | 0.00056853 | 4246     | FLJ44006       | 5m    |
| MspFrag4538   | 1  | 31838248  | 31838530  | 282  | 5.59885978 | 0.00057743 | 119      | COL16A1        | 3m    |
| MspFrag29325  | 3  | 135128836 | 135129030 | 194  | 5.84114475 | 0.00057743 |          |                |       |
| MspFrag122227 | 17 | 38189972  | 38190183  | 211  | 5.62450547 | 0.00059834 | 820      | AK096052       | 5p    |
| MspFrag24467  | 2  | 242506384 | 242506434 | 50   | 5.59188404 | 0.00060889 |          |                |       |
| MspFrag121189 | 17 | 30592940  | 30593508  | 568  | 5.79984489 | 0.00063269 | 696      | MGC19764       | 3p    |
| MspFrag36706  | 4  | 155070130 | 155070506 | 376  | 5.59831695 | 0.00064584 | 2297     | SFRP2          | 5m    |

|               |    |           |           |     |            |            |            |                     |          |
|---------------|----|-----------|-----------|-----|------------|------------|------------|---------------------|----------|
| MspFrag14451  | 2  | 5957756   | 5957971   | 215 | -5.6205162 | 0.00064584 |            |                     |          |
| MspFrag98973  | 13 | 99419489  | 99419792  | 303 | 5.54763135 | 0.00064987 |            |                     |          |
| MspFrag27749  | 3  | 71885407  | 71885467  | 60  | 5.59170317 | 0.00064987 | -2 423 -58 | EIF4E3 GPR27 EIF4E3 | in 3p in |
| MspFrag8680   | 1  | 115035363 | 115035789 | 426 | 5.57646754 | 0.00064987 | 22         | CR936771            | 5m       |
| MspFrag10533  | 1  | 158255475 | 158255930 | 455 | 5.94901681 | 0.00065823 |            |                     |          |
| MspFrag2815   | 1  | 16279063  | 16279529  | 466 | 5.52664011 | 0.0006756  |            |                     |          |
| MspFrag52202  | 6  | 170370374 | 170370646 | 272 | 5.58686615 | 0.0006767  |            |                     |          |
| MspFrag3571   | 1  | 22783586  | 22783974  | 388 | 5.53376345 | 0.00067873 | 823        | EPHB2               | 5p       |
| MspFrag8463   | 1  | 111770527 | 111771050 | 523 | 5.52300104 | 0.00071275 |            |                     |          |
| MspFrag35112  | 4  | 85775167  | 85775377  | 210 | 5.49016902 | 0.00074977 | 1189       | NKX6-1              | 3m       |
| MspFrag21537  | 2  | 175420626 | 175420995 | 369 | 5.52908054 | 0.00074977 |            |                     |          |
| MspFrag96731  | 13 | 20798576  | 20799044  | 468 | 5.66785365 | 0.00075956 |            |                     |          |
| MspFrag110209 | 16 | 555351    | 555926    | 575 | -5.5352535 | 0.00078385 | 1106       | FLJ36208            | 3p       |
| MspFrag39832  | 5  | 43078244  | 43078381  | 137 | 5.44872531 | 0.00085994 | 2146 293   | LOC389289 LOC15366  | 5m 5p    |
| MspFrag129098 | 18 | 43043562  | 43043865  | 303 | 5.44872531 | 0.00085994 |            |                     |          |
| MspFrag135035 | 19 | 11005758  | 11005846  | 88  | 5.55880472 | 0.00090701 |            |                     |          |
| MspFrag10531  | 1  | 158255095 | 158255382 | 287 | 5.49856789 | 0.00090942 |            |                     |          |
| MspFrag67375  | 9  | 1035467   | 1035633   | 166 | 5.48760065 | 0.00091074 | 4704       | BX647565            | 3p       |
| MspFrag55184  | 7  | 42051301  | 42051673  | 372 | 5.67838837 | 0.00091074 |            |                     |          |
| MspFrag150175 | 22 | 21848205  | 21848394  | 189 | 5.59364818 | 0.00091074 | 953        | BCR                 | 5p       |
| MspFrag31365  | 3  | 198245118 | 198245392 | 274 | 5.41593017 | 0.00091074 | 166        | MFI2                | 5m       |
| MspFrag100504 | 14 | 23873319  | 23873675  | 356 | 5.41593017 | 0.00091074 | 29 3665    | ADCY4 AK131333      | 3m 5m    |
| MspFrag73838  | 9  | 137224431 | 137224484 | 53  | 5.41593017 | 0.00091074 | 89         | ENTPD2              | 5m       |
| MspFrag10537  | 1  | 158307786 | 158308067 | 281 | 5.42336856 | 0.0009339  | 696        | HSPA6               | 5p       |
| MspFrag19020  | 2  | 104931659 | 104931886 | 227 | 5.46968393 | 0.00093891 | 1173       | POU3F3              | 5p       |
| MspFrag88158  | 11 | 93917581  | 93917809  | 228 | 5.50913685 | 0.00093891 | 807        | FUT4                | 5p       |
| MspFrag136793 | 19 | 19082202  | 19082391  | 189 | 5.41178068 | 0.00103561 | -8 -181    | AF521885 AF521885   | in in    |
| MspFrag6510   | 1  | 52780553  | 52780854  | 301 | 5.35897436 | 0.00113622 | 489        | GPX7                | 5p       |
| MspFrag154875 | 23 | 39303900  | 39304278  | 378 | 5.68056256 | 0.00113622 |            |                     |          |
| MspFrag1242   | 1  | 2873712   | 2874055   | 343 | -5.5065631 | 0.00114684 |            |                     |          |
| MspFrag89444  | 11 | 128007477 | 128008054 | 577 | -5.344314  | 0.00115176 |            |                     |          |
| MspFrag80111  | 10 | 119291573 | 119291755 | 182 | 5.3557147  | 0.00115176 | 190        | EMX2                | 3p       |
| MspFrag143611 | 20 | 21439964  | 21440263  | 299 | 5.33896041 | 0.00117509 |            |                     |          |
| MspFrag122225 | 17 | 38189590  | 38189863  | 273 | 5.39191441 | 0.00117509 | 438        | AK096052            | 5p       |
| MspFrag125550 | 17 | 72830600  | 72830817  | 217 | 5.63430246 | 0.00119377 | 1859       | AK123491            | 3p       |
| MspFrag123174 | 17 | 44156128  | 44156377  | 249 | 5.44762496 | 0.00120291 | 1247       | PRAC                | 5m       |
| MspFrag73047  | 9  | 134335212 | 134335556 | 344 | 5.38436635 | 0.00121071 |            |                     |          |
| MspFrag40026  | 5  | 54555202  | 54555442  | 240 | 5.37311556 | 0.00121071 |            |                     |          |
| MspFrag95060  | 12 | 119162992 | 119163301 | 309 | 5.71801723 | 0.00122893 |            |                     |          |
| MspFrag111827 | 16 | 3179136   | 3179475   | 339 | 5.71801723 | 0.00122893 |            |                     |          |
| MspFrag23738  | 2  | 236183911 | 236184343 | 432 | 5.36795879 | 0.00122893 | 426        | CENTG2              | 3p       |
| MspFrag45473  | 6  | 1560082   | 1560244   | 162 | 5.36795879 | 0.00122893 |            |                     |          |
| MspFrag40563  | 5  | 72630853  | 72631417  | 564 | 5.30361632 | 0.00129106 |            |                     |          |
| MspFrag12194  | 1  | 211112474 | 211112704 | 230 | 5.28818133 | 0.00131742 | 333        | PTPN14              | 3m       |
| MspFrag105069 | 15 | 21157085  | 21157691  | 606 | -5.3198689 | 0.00131742 |            |                     |          |
| MspFrag36180  | 4  | 134430834 | 134431225 | 391 | 5.28966271 | 0.0013399  |            |                     |          |
| MspFrag79532  | 10 | 105223111 | 105223212 | 101 | -5.2896627 | 0.0013399  |            |                     |          |
| MspFrag127371 | 18 | 899338    | 899537    | 199 | 5.28966271 | 0.0013399  |            |                     |          |
| MspFrag43441  | 5  | 148630358 | 148631113 | 755 | 5.4148184  | 0.00134464 | 513        | BC040723            | 3p       |
| MspFrag35111  | 4  | 85774884  | 85775166  | 282 | 5.27253349 | 0.0013452  | 1400       | NKX6-1              | 3m       |
| MspFrag67783  | 9  | 14337785  | 14338329  | 544 | 5.45447946 | 0.0013452  |            |                     |          |
| MspFrag119814 | 17 | 15843894  | 15843950  | 56  | 5.28469168 | 0.0013452  | 388        | TTC19               | 5p       |
| MspFrag124852 | 17 | 69721655  | 69721883  | 228 | 5.28469168 | 0.0013452  | 344        | AF319952            | 5p       |
| MspFrag23532  | 2  | 233077440 | 233077489 | 49  | 5.27104718 | 0.0013452  | 181        | BC067110            | 5m       |
| MspFrag149506 | 22 | 17885286  | 17885473  | 187 | 5.25599978 | 0.0013452  | 1941       | CLDN5               | 3m       |
| MspFrag120814 | 17 | 24967412  | 24967845  | 433 | 5.32596517 | 0.0013452  | 536        | CORO6               | 3m       |
| MspFrag32397  | 4  | 2385838   | 2386112   | 274 | 5.2797685  | 0.0013452  | 1455 1819  | BC053664 AK126028   | 3m 3p    |
| MspFrag96751  | 13 | 21141260  | 21141510  | 250 | 5.2797685  | 0.0013452  | 2364       | FGF9                | 3p       |
| MspFrag62128  | 8  | 22518277  | 22518377  | 100 | 5.64881323 | 0.0013452  | 118 46     | KIAA1967 BC065495   | 3p 5p    |
| MspFrag101812 | 14 | 60179151  | 60179607  | 456 | 5.2558745  | 0.0013452  |            |                     |          |
| MspFrag42441  | 5  | 134394818 | 134395156 | 338 | 5.46841794 | 0.0013452  | 1712       | AK026965            | 3p       |
| MspFrag56289  | 7  | 72093180  | 72093418  | 238 | 5.24151279 | 0.0013452  |            |                     |          |
| MspFrag124300 | 17 | 59131982  | 59132167  | 185 | 5.2442354  | 0.0013452  | 765        | MGC10986            | 5m       |
| MspFrag122371 | 17 | 39446974  | 39447439  | 465 | 5.25887166 | 0.0013452  | 432        | MGC4251             | 3m       |

|               |    |           |           |      |            |            |           |                   |       |
|---------------|----|-----------|-----------|------|------------|------------|-----------|-------------------|-------|
| MspFrag68660  | 9  | 37736746  | 37737237  | 491  | -5.2464791 | 0.0013452  |           |                   |       |
| MspFrag51520  | 6  | 158214859 | 158214909 | 50   | 5.31037263 | 0.0013452  | 157       | SNX9              | 5p    |
| MspFrag86469  | 11 | 65871490  | 65871569  | 79   | 5.31037263 | 0.0013452  | 102 2358  | B3GNT6 BRMS1      | 3m 5m |
| MspFrag148600 | 21 | 44699701  | 44699819  | 118  | 5.31037263 | 0.0013452  | 1         | LRRC3             | 3p    |
| MspFrag45381  | 6  | 1335306   | 1335429   | 123  | 5.31037263 | 0.0013452  | 239       | FOXF2             | 5p    |
| MspFrag73492  | 9  | 136676027 | 136676088 | 61   | -5.3103726 | 0.0013452  |           |                   |       |
| MspFrag140473 | 19 | 54722908  | 54723189  | 281  | 5.31037263 | 0.0013452  | 222       | RCN3              | 5p    |
| MspFrag10580  | 1  | 159262915 | 159262938 | 23   | 5.23635802 | 0.0013452  | 42        | UAP1              | 3p    |
| MspFrag22891  | 2  | 219909327 | 219909543 | 216  | 5.23635802 | 0.0013452  | 150       | ABC6              | 5m    |
| MspFrag31662  | 4  | 772776    | 773296    | 520  | -5.236358  | 0.0013452  |           |                   |       |
| MspFrag36178  | 4  | 134430687 | 134430742 | 55   | 5.29257977 | 0.0013452  |           |                   |       |
| MspFrag77449  | 10 | 72826217  | 72826402  | 185  | 5.29257977 | 0.0013452  | 294       | CDH23             | 3p    |
| MspFrag144114 | 20 | 30536204  | 30536261  | 57   | 5.29257977 | 0.0013452  | 1158      | BC038088          | 5m    |
| MspFrag148458 | 21 | 43964947  | 43965429  | 482  | 5.52792759 | 0.0013452  | 1527      | PDXK              | 5p    |
| MspFrag33256  | 4  | 13221404  | 13221655  | 251  | 5.39118109 | 0.0013452  | 652       | BAPX1             | 3m    |
| MspFrag16992  | 2  | 63192384  | 63192967  | 583  | 5.25239851 | 0.0013452  |           |                   |       |
| MspFrag16310  | 2  | 44940415  | 44940696  | 281  | 5.31619252 | 0.0013452  |           |                   |       |
| MspFrag54519  | 7  | 26997703  | 26998193  | 490  | 5.27997953 | 0.0013452  | -123 -367 | HOXA11 HOXA11     | in in |
| MspFrag34327  | 4  | 55364484  | 55364745  | 261  | 5.22396411 | 0.0013452  | 288       | KIT               | 3p    |
| MspFrag21515  | 2  | 175032504 | 175032557 | 53   | 5.23271586 | 0.0013452  | 4703      | FLJ46347          | 5m    |
| MspFrag53469  | 7  | 5240368   | 5240418   | 50   | 5.23271586 | 0.0013452  | 1381      | AK125308          | 3m    |
| MspFrag98526  | 13 | 78073914  | 78074098  | 184  | 5.23271586 | 0.0013452  | 1598      | POU4F1            | 3m    |
| MspFrag4296   | 1  | 28665407  | 28665466  | 59   | 5.32525858 | 0.00134739 | 12        | CHC1              | 5p    |
| MspFrag11474  | 1  | 197984459 | 197984775 | 316  | 5.32058959 | 0.00137728 | 223       | PKP1              | 5p    |
| MspFrag103382 | 14 | 94309190  | 94309414  | 224  | 5.30916536 | 0.00138642 | 2938      | GSC               | 5m    |
| MspFrag39400  | 5  | 25218518  | 25226390  | 7872 | 5.21162213 | 0.00139256 |           |                   |       |
| MspFrag108222 | 15 | 74414639  | 74414977  | 338  | 5.20705493 | 0.00139919 | 1224      | ISL2              | 3p    |
| MspFrag130315 | 18 | 74367316  | 74367647  | 331  | -5.2069479 | 0.00139938 |           |                   |       |
| MspFrag158240 | 23 | 152511833 | 152512111 | 278  | 5.57770579 | 0.00140819 | 1099 651  | BCAP31 ABCD1      | 5m 5p |
| MspFrag9602   | 1  | 148893495 | 148895013 | 1518 | 5.21723117 | 0.00140919 |           |                   |       |
| MspFrag19595  | 2  | 113973377 | 113973577 | 200  | 5.22930144 | 0.0014256  | 487       | FOXD4L1           | 5p    |
| MspFrag42490  | 5  | 134853823 | 134854112 | 289  | 5.18101334 | 0.00151152 |           |                   |       |
| MspFrag157632 | 23 | 133409297 | 133409576 | 279  | 5.22858094 | 0.00152118 | 3124      | BC007360          | 5m    |
| MspFrag27115  | 3  | 52543768  | 52544136  | 368  | 5.30740388 | 0.00152118 | -26 -342  | FLJ12442 FLJ12442 | in in |
| MspFrag134378 | 19 | 7839500   | 7839861   | 361  | 5.40324893 | 0.00153017 |           |                   |       |
| MspFrag36168  | 4  | 134428351 | 134429267 | 916  | 5.17218691 | 0.00153593 | 277       | PCDH10            | 5p    |
| MspFrag65902  | 8  | 142698527 | 142699371 | 844  | -5.1838884 | 0.00154499 |           |                   |       |
| MspFrag69692  | 9  | 87571023  | 87571431  | 408  | 5.73835078 | 0.00154848 | 340       | BC012612          | 5p    |
| MspFrag105880 | 15 | 38446968  | 38447392  | 424  | 5.20198943 | 0.00155346 |           |                   |       |
| MspFrag16975  | 2  | 63187528  | 63188128  | 600  | 5.2521236  | 0.00159074 | 1487      | OTX1              | 3p    |
| MspFrag39521  | 5  | 32748434  | 32748721  | 287  | 5.2521236  | 0.00159074 | 1013      | NPR3              | 5p    |
| MspFrag44181  | 5  | 174091905 | 174092097 | 192  | 5.18357661 | 0.00164245 |           |                   |       |
| MspFrag8860   | 1  | 119242257 | 119242512 | 255  | 5.1668014  | 0.0016738  | 1709      | AK127536          | 3m    |
| MspFrag6383   | 1  | 50604894  | 50605207  | 313  | 5.15472881 | 0.00169662 |           |                   |       |
| MspFrag79896  | 10 | 116381206 | 116381555 | 349  | 5.37118955 | 0.00170453 |           |                   |       |
| MspFrag68348  | 9  | 34635979  | 34636691  | 712  | -5.4923578 | 0.00178703 | -1 -711   | CR623046 CR623046 | in in |
| MspFrag37034  | 4  | 174814860 | 174815332 | 472  | 5.18118547 | 0.00181293 |           |                   |       |
| MspFrag101819 | 14 | 60185177  | 60185673  | 496  | 5.13124921 | 0.00181293 | 260       | SIX1              | 3m    |
| MspFrag8852   | 1  | 119238491 | 119238974 | 483  | 5.10297202 | 0.00188763 |           |                   |       |
| MspFrag49331  | 6  | 87889233  | 87889283  | 50   | 5.10297202 | 0.00188763 |           |                   |       |
| MspFrag138649 | 19 | 45422226  | 45422510  | 284  | 5.63019788 | 0.00189201 | 1894      | FLJ13265          | 3m    |
| MspFrag57950  | 7  | 103224284 | 103224481 | 197  | 5.09582295 | 0.00192771 | 370       | RELN              | 5m    |
| MspFrag130823 | 18 | 75849773  | 75849827  | 54   | 5.09582295 | 0.00192771 | 253       | TXNL4A            | 5m    |
| MspFrag154804 | 23 | 37187240  | 37187524  | 284  | 5.17308541 | 0.0019494  | 227       | LANCL3            | 5p    |
| MspFrag1339   | 1  | 3163795   | 3164122   | 327  | -5.5693293 | 0.00202209 |           |                   |       |
| MspFrag74118  | 9  | 137486781 | 137486849 | 68   | 5.13858401 | 0.00202672 |           |                   |       |
| MspFrag48491  | 6  | 44373563  | 44374341  | 778  | 5.14841478 | 0.00202672 | 160       | MGC33600          | 5m    |
| MspFrag1539   | 1  | 3649032   | 3649811   | 779  | 5.49258473 | 0.00202672 |           |                   |       |
| MspFrag32542  | 4  | 3341640   | 3341948   | 308  | 5.07075179 | 0.00208306 |           |                   |       |
| MspFrag5384   | 1  | 39873289  | 39873532  | 243  | 5.42148359 | 0.00211412 | 90        | PPIE              | 3p    |
| MspFrag76840  | 10 | 51242464  | 51242541  | 77   | 5.08304356 | 0.00211674 | 32        | NCOA4             | 5p    |
| MspFrag109481 | 15 | 93669982  | 93671183  | 1201 | 5.08304356 | 0.00211674 |           |                   |       |
| MspFrag58897  | 7  | 129875779 | 129875892 | 113  | 5.16953827 | 0.00212414 | 223       | KLF14             | 3m    |
| MspFrag114436 | 16 | 45628774  | 45629016  | 242  | 5.05688491 | 0.00212467 |           |                   |       |



|               |    |           |           |      |            |            |             |  |                   |          |
|---------------|----|-----------|-----------|------|------------|------------|-------------|--|-------------------|----------|
| MspFrag90376  | 12 | 6626277   | 6626591   | 314  | 5.44238716 | 0.00212467 | 250         |  | ACRBP             | 3m       |
| MspFrag154662 | 23 | 30086996  | 30087286  | 290  | 5.05697052 | 0.00219802 | -137 -153   |  | NROB1 NROB1       | in in    |
| MspFrag59888  | 7  | 150515746 | 150516196 | 450  | 5.05251445 | 0.00220336 | 594         |  | AK127717          | 5m       |
| MspFrag16360  | 2  | 45081663  | 45081840  | 177  | 5.14654    | 0.00224784 | 1152        |  | SIX3              | 5p       |
| MspFrag143904 | 20 | 25513020  | 25513669  | 649  | 5.08284417 | 0.00225318 | 484         |  | KIAA0980          | 3m       |
| MspFrag54200  | 7  | 23019260  | 23021044  | 1784 | 5.03561495 | 0.00225318 |             |  |                   |          |
| MspFrag50853  | 6  | 137860054 | 137860272 | 218  | 5.03690925 | 0.00228679 | 2830        |  | OLIG3             | 5m       |
| MspFrag127331 | 18 | 703025    | 703357    | 332  | 5.18147273 | 0.00235072 | 363         |  | BC001285          | 5m       |
| MspFrag78455  | 10 | 94816223  | 94816475  | 252  | 5.14496418 | 0.00237057 |             |  |                   |          |
| MspFrag112067 | 16 | 4527624   | 4527905   | 281  | 5.0908457  | 0.0023912  | 858         |  | BC002882          | 3m       |
| MspFrag21495  | 2  | 175027330 | 175027503 | 173  | 5.04116497 | 0.0023912  | 298         |  | FLJ46347          | 3m       |
| MspFrag95732  | 12 | 127046767 | 127047289 | 522  | -5.0324994 | 0.0023912  |             |  |                   |          |
| MspFrag138720 | 19 | 45717010  | 45717286  | 276  | 5.06103521 | 0.0023912  |             |  |                   |          |
| MspFrag39760  | 5  | 40871578  | 40871991  | 413  | 5.01227728 | 0.00240368 | 434         |  | RPL37             | 5m       |
| MspFrag31070  | 3  | 195404256 | 195404671 | 415  | 5.01255183 | 0.0024162  |             |  |                   |          |
| MspFrag91791  | 12 | 47677704  | 47677997  | 293  | 5.01255183 | 0.0024162  | 1358        |  | DDN               | 3m       |
| MspFrag107481 | 15 | 65907127  | 65907377  | 250  | 5.01618334 | 0.0024162  |             |  |                   |          |
| MspFrag144506 | 20 | 34634646  | 34634947  | 301  | 5.35285543 | 0.0024162  | 489         |  | TGIF2             | 3p       |
| MspFrag24085  | 2  | 239889845 | 239889914 | 69   | 5.03988854 | 0.00242978 |             |  |                   |          |
| MspFrag143051 | 20 | 5981360   | 5982218   | 858  | 5.16213127 | 0.00242978 | 440         |  | AK172833          | 3m       |
| MspFrag24087  | 2  | 239889985 | 239890404 | 419  | 5.03117349 | 0.00243177 |             |  |                   |          |
| MspFrag30773  | 3  | 185582043 | 185582341 | 298  | 5.01183385 | 0.0024549  | 3409 1347   |  | THPO CHRD         | 5m 5p    |
| MspFrag85443  | 11 | 62230531  | 62231168  | 637  | -5.1147885 | 0.00254038 | 227 540 168 |  | BSCL2 GNG3 BSCL2  | 3m 3p 5m |
| MspFrag114925 | 16 | 54783038  | 54783220  | 182  | 4.99880598 | 0.00254038 | 428         |  | GNAO1             | 3p       |
| MspFrag131611 | 19 | 1019651   | 1020294   | 643  | 4.98430726 | 0.00254038 | 1478        |  | HA-1              | 5p       |
| MspFrag56540  | 7  | 74018306  | 74018544  | 238  | 4.98363263 | 0.00254038 |             |  |                   |          |
| MspFrag68827  | 9  | 42195351  | 42195402  | 51   | 5.13470645 | 0.00254038 |             |  |                   |          |
| MspFrag106707 | 15 | 50870417  | 50870658  | 241  | 5.13470645 | 0.00254038 | 916         |  | ONECUT1           | 5m       |
| MspFrag133061 | 19 | 3130429   | 3130771   | 342  | 4.98182445 | 0.00254038 | 660         |  | EDG6              | 5p       |
| MspFrag9503   | 1  | 147916599 | 147916941 | 342  | 5.03051965 | 0.00257267 |             |  |                   |          |
| MspFrag134142 | 19 | 6611032   | 6611046   | 14   | -5.0373922 | 0.00257284 |             |  |                   |          |
| MspFrag150393 | 22 | 24071950  | 24072354  | 404  | -4.9737352 | 0.00259222 |             |  |                   |          |
| MspFrag99518  | 13 | 111770121 | 111770319 | 198  | 4.99749221 | 0.00259222 | 208         |  | SOX1              | 5p       |
| MspFrag50087  | 6  | 109910096 | 109910836 | 740  | 5.02249033 | 0.0027286  | 265         |  | BC036731          | 3m       |
| MspFrag20426  | 2  | 131555209 | 131555243 | 34   | 5.02249033 | 0.0027286  |             |  |                   |          |
| MspFrag69062  | 9  | 67245691  | 67245844  | 153  | 4.98449241 | 0.00275074 |             |  |                   |          |
| MspFrag11204  | 1  | 180117706 | 180117976 | 270  | 4.94974419 | 0.00278597 | 1418        |  | NMNAT2            | 3m       |
| MspFrag33269  | 4  | 13225082  | 13225281  | 199  | 4.96610344 | 0.0027941  | 2775        |  | BAPX1             | 5m       |
| MspFrag56619  | 7  | 75177582  | 75180465  | 2883 | -4.9661034 | 0.0027941  |             |  |                   |          |
| MspFrag46663  | 6  | 26658522  | 26658899  | 377  | 5.27798663 | 0.00282544 |             |  |                   |          |
| MspFrag151210 | 22 | 36240218  | 36240284  | 66   | 4.99898649 | 0.00282544 | 508         |  | CARD10            | 5m       |
| MspFrag77390  | 10 | 71870289  | 71870517  | 228  | 5.09193573 | 0.00282544 | 912         |  | NODAL             | 3m       |
| MspFrag122683 | 17 | 40862706  | 40862760  | 54   | 5.09193573 | 0.00282544 | 3926        |  | ARHGAP27          | 5m       |
| MspFrag49937  | 6  | 108546152 | 108546292 | 140  | 4.95927335 | 0.00288598 |             |  |                   |          |
| MspFrag12276  | 1  | 216490302 | 216490755 | 453  | 5.23826766 | 0.00293287 | -367 -86    |  | SLC30A10 SLC30A10 | in in    |
| MspFrag42443  | 5  | 134395253 | 134395570 | 317  | 4.93142699 | 0.00295358 | 1298        |  | AK026965          | 3p       |
| MspFrag98179  | 13 | 52211554  | 52211765  | 211  | 4.95204206 | 0.00295358 | 183         |  | LECT1             | 3m       |
| MspFrag41844  | 5  | 121675570 | 121675611 | 41   | 4.96196331 | 0.00295358 | 174         |  | BC094759          | 3p       |
| MspFrag97872  | 13 | 46025086  | 46025151  | 65   | 4.96196331 | 0.00295358 | 152         |  | LRCH1             | 3p       |
| MspFrag108242 | 15 | 74421984  | 74422165  | 181  | 4.96196331 | 0.00295358 |             |  |                   |          |
| MspFrag4389   | 1  | 29281582  | 29281828  | 246  | 5.00569188 | 0.00298402 |             |  |                   |          |
| MspFrag54477  | 7  | 26972982  | 26973212  | 230  | 4.92198915 | 0.00299139 | 3446        |  | HOXA7             | 5m       |
| MspFrag108855 | 15 | 82114703  | 82114966  | 263  | 4.92198915 | 0.00299139 | 853         |  | AK092324          | 5p       |
| MspFrag119588 | 17 | 9772615   | 9773198   | 583  | -5.1186109 | 0.00300342 |             |  |                   |          |
| MspFrag86866  | 11 | 67527006  | 67527364  | 358  | 4.91147698 | 0.0030432  |             |  |                   |          |
| MspFrag65905  | 8  | 142699553 | 142699643 | 90   | -4.9784302 | 0.00309209 |             |  |                   |          |
| MspFrag71554  | 9  | 123858258 | 123858600 | 342  | 4.89211928 | 0.00324207 |             |  |                   |          |
| MspFrag15523  | 2  | 27095360  | 27095620  | 260  | -4.9265699 | 0.00332379 |             |  |                   |          |
| MspFrag12221  | 1  | 211644652 | 211644703 | 51   | 5.07449017 | 0.00332379 | 291         |  | KCNK2             | 3p       |
| MspFrag73811  | 9  | 137201456 | 137201596 | 140  | 5.07449017 | 0.00332379 | 1703 2977   |  | FUT7 AF178941     | 3m 5m    |
| MspFrag104165 | 14 | 102815743 | 102815922 | 179  | 5.16735285 | 0.00332379 |             |  |                   |          |
| MspFrag110623 | 16 | 1036977   | 1037257   | 280  | 5.16871318 | 0.00332379 |             |  |                   |          |
| MspFrag69109  | 9  | 68151707  | 68151860  | 153  | 4.88102725 | 0.00332379 |             |  |                   |          |
| MspFrag7583   | 1  | 87309802  | 87310069  | 267  | 4.91108913 | 0.00333187 | 124         |  | LOC339524         | 5p       |

|               |    |           |           |       |            |            |           |                   |       |
|---------------|----|-----------|-----------|-------|------------|------------|-----------|-------------------|-------|
| MspFrag53102  | 7  | 2284444   | 2284671   | 227   | 4.88069428 | 0.0033583  |           |                   |       |
| MspFrag136587 | 19 | 18408763  | 18408972  | 209   | 4.88069428 | 0.0033583  | 954       | BC018952          | 3m    |
| MspFrag65904  | 8  | 142699463 | 142699552 | 89    | -4.8755248 | 0.0033583  |           |                   |       |
| MspFrag72327  | 9  | 129279429 | 129279830 | 401   | 5.18801436 | 0.00344209 |           |                   |       |
| MspFrag76726  | 10 | 49402585  | 49402881  | 296   | 4.87086225 | 0.00345283 |           |                   |       |
| MspFrag9583   | 1  | 148624469 | 148624675 | 206   | 4.89502314 | 0.00345283 |           |                   |       |
| MspFrag11076  | 1  | 176935970 | 176936199 | 229   | 4.92987355 | 0.00345283 |           |                   |       |
| MspFrag106375 | 15 | 43245921  | 43246227  | 306   | 4.92987355 | 0.00345283 |           |                   |       |
| MspFrag51298  | 6  | 150482581 | 150482874 | 293   | 4.86126052 | 0.00352702 | 265       | ULBP3             | 5m    |
| MspFrag142839 | 20 | 3610948   | 3611237   | 289   | 4.86126052 | 0.00352702 | 100 62    | AK126487 BC062663 | 3m 5m |
| MspFrag82812  | 11 | 2840588   | 2840613   | 25    | 4.9221969  | 0.00352702 |           |                   |       |
| MspFrag101788 | 14 | 60045914  | 60046363  | 449   | 4.85357468 | 0.00352702 | 140       | SIX6              | 5p    |
| MspFrag63177  | 8  | 43245757  | 43246228  | 471   | -4.9365435 | 0.00352702 |           |                   |       |
| MspFrag131520 | 19 | 955693    | 956041    | 348   | 4.95891718 | 0.0035851  |           |                   |       |
| MspFrag53535  | 7  | 5406462   | 5406746   | 284   | 5.00526762 | 0.00363102 | 768       | FSCN1             | 5p    |
| MspFrag68594  | 9  | 37023945  | 37024362  | 417   | 4.8424194  | 0.00363102 | -324 -93  | AY463957 AY463957 | in in |
| MspFrag124723 | 17 | 67624258  | 67624471  | 213   | 4.8424194  | 0.00363102 | 4284      | SOX9              | 3p    |
| MspFrag39806  | 5  | 43028165  | 43028355  | 190   | 4.83945922 | 0.00366182 |           |                   |       |
| MspFrag61519  | 8  | 10626152  | 10626360  | 208   | 5.08310835 | 0.00366764 | 720       | SOX7              | 5m    |
| MspFrag83566  | 11 | 14883932  | 14884212  | 280   | 4.9397066  | 0.003737   |           |                   |       |
| MspFrag12172  | 1  | 210544856 | 210545674 | 818   | 5.05512618 | 0.00376556 | 4580      | PROX1             | 3p    |
| MspFrag32568  | 4  | 3519528   | 3519951   | 423   | 4.83831714 | 0.00380087 | 3288      | AK096456          | 3p    |
| MspFrag27831  | 3  | 75554127  | 75554898  | 771   | 5.13450372 | 0.00382982 |           |                   |       |
| MspFrag120854 | 17 | 25729295  | 25729911  | 616   | 5.13450372 | 0.00382982 | 171       | CPD               | 3p    |
| MspFrag62265  | 8  | 23618765  | 23618976  | 211   | 4.85238193 | 0.00382982 |           |                   |       |
| MspFrag25187  | 3  | 15081919  | 15082508  | 589   | 4.98864574 | 0.00383073 | 99        | MRPS25            | 5m    |
| MspFrag34300  | 4  | 54935347  | 54936075  | 728   | 4.82649863 | 0.00383073 | 299       | PDGFRA            | 3p    |
| MspFrag37038  | 4  | 174818379 | 174818663 | 284   | 4.82649863 | 0.00383073 |           |                   |       |
| MspFrag87714  | 11 | 76428213  | 76428440  | 227   | 4.82649863 | 0.00383073 |           |                   |       |
| MspFrag46789  | 6  | 28294066  | 28294455  | 389   | 5.05924207 | 0.00388519 | 231       | BC050562          | 3m    |
| MspFrag56317  | 7  | 72236385  | 72236496  | 111   | 5.05924207 | 0.00388519 |           |                   |       |
| MspFrag16521  | 2  | 47054206  | 47054324  | 118   | 4.86613285 | 0.00389868 | 260       | BC040357          | 3m    |
| MspFrag51733  | 6  | 164022014 | 164022202 | 188   | 4.86613285 | 0.00389868 |           |                   |       |
| MspFrag97209  | 13 | 27965939  | 27966185  | 246   | 4.86613285 | 0.00389868 | 1031      | FLT1              | 3m    |
| MspFrag4723   | 1  | 33020630  | 33020859  | 229   | 4.80548965 | 0.00389868 | 331       | HPCA              | 3p    |
| MspFrag25995  | 3  | 42280061  | 42280194  | 133   | 4.80548965 | 0.00389868 | 1205      | CCK               | 3m    |
| MspFrag43928  | 5  | 170669265 | 170669473 | 208   | 4.80548965 | 0.00389868 | 373       | TLX3              | 5p    |
| MspFrag60411  | 7  | 156431344 | 156431394 | 50    | 4.80548965 | 0.00389868 | 165       | BC014029          | 5p    |
| MspFrag46716  | 6  | 27387840  | 27388093  | 253   | 4.80790794 | 0.00389868 |           |                   |       |
| MspFrag100887 | 14 | 36119146  | 36119409  | 263   | 4.80593138 | 0.00389868 |           |                   |       |
| MspFrag98537  | 13 | 78074955  | 78075186  | 231   | 4.90262749 | 0.00389868 | 510       | POU4F1            | 3m    |
| MspFrag113285 | 16 | 28283382  | 28283468  | 86    | 4.79975775 | 0.00394862 |           |                   |       |
| MspFrag124610 | 17 | 63706209  | 63706660  | 451   | 4.79975775 | 0.00394862 | -89 -362  | BC080624 BC080624 | in in |
| MspFrag53340  | 7  | 4895935   | 4896221   | 286   | 5.0237883  | 0.00394862 |           |                   |       |
| MspFrag68279  | 9  | 34370008  | 34370397  | 389   | 4.79877599 | 0.00396555 | 1190 3145 | AK094751 BC070098 | 3m 5m |
| MspFrag26710  | 3  | 49731322  | 49731667  | 345   | 4.80512448 | 0.00397807 | 460       | AMIGO3            | 3m    |
| MspFrag85691  | 11 | 63731436  | 63731642  | 206   | 4.82555455 | 0.00397807 | 648       | URP2              | 5p    |
| MspFrag67459  | 9  | 2613599   | 2614303   | 704   | 4.80794141 | 0.00397807 | 1411      | VLDLR             | 5p    |
| MspFrag111109 | 16 | 1953474   | 1954236   | 762   | 4.79743629 | 0.0040346  | 394       | BC071922          | 3m    |
| MspFrag124633 | 17 | 63766994  | 63767675  | 681   | 4.79590293 | 0.0040346  |           |                   |       |
| MspFrag43245  | 5  | 140851842 | 140852134 | 292   | 4.82056343 | 0.0040346  |           |                   |       |
| MspFrag156429 | 23 | 80050302  | 80065306  | 15004 | 4.82056343 | 0.0040346  |           |                   |       |
| MspFrag7710   | 1  | 90903317  | 90903690  | 373   | 4.79134544 | 0.00404303 |           |                   |       |
| MspFrag55218  | 7  | 43062129  | 43062415  | 286   | 4.87541875 | 0.00405873 |           |                   |       |
| MspFrag43427  | 5  | 146869675 | 146869860 | 185   | 4.94616943 | 0.00418848 | -48 -137  | BC077077 BC077077 | in in |
| MspFrag47196  | 6  | 31804402  | 31804867  | 465   | -5.0745559 | 0.0042022  | 396       | CR616443          | 3m    |
| MspFrag35916  | 4  | 122976002 | 122976767 | 765   | 4.82994922 | 0.00423823 | 221       | ANXA5             | 5m    |
| MspFrag132652 | 19 | 2204430   | 2204721   | 291   | 4.7791359  | 0.00425388 | 1623      | FLJ32416          | 3m    |
| MspFrag91986  | 12 | 48635567  | 48635830  | 263   | 4.84624388 | 0.00428037 |           |                   |       |
| MspFrag158024 | 23 | 149821333 | 149821893 | 560   | 4.80848023 | 0.00428502 | 443       | HMGB3             | 3p    |
| MspFrag69262  | 9  | 71993937  | 71994232  | 295   | 4.8877234  | 0.00428635 | 15        | BC012859          | 5p    |
| MspFrag52756  | 7  | 1068699   | 1068979   | 280   | 4.78366931 | 0.00428855 |           |                   |       |
| MspFrag36848  | 4  | 164609888 | 164610614 | 726   | -4.7727794 | 0.00431688 | 739       | NPY1R             | 3m    |
| MspFrag57945  | 7  | 103223545 | 103223731 | 186   | 4.77277943 | 0.00431688 | 182       | RELN              | 3m    |

|               |    |           |           |      |            |            |               |                   |        |          |
|---------------|----|-----------|-----------|------|------------|------------|---------------|-------------------|--------|----------|
| MspFrag68043  | 9  | 23812615  | 23813090  | 475  | 4.77277943 | 0.00431688 | 1137          |                   | ELAVL2 | 5m       |
| MspFrag104036 | 14 | 102129304 | 102129413 | 109  | -4.7727794 | 0.00431688 | 319           |                   | RCOR1  | 5p       |
| MspFrag128335 | 18 | 18393965  | 18394194  | 229  | 4.77277943 | 0.00431688 |               |                   |        |          |
| MspFrag19926  | 2  | 121038231 | 121038980 | 749  | -4.8451913 | 0.00433363 |               |                   |        |          |
| MspFrag22209  | 2  | 200155027 | 200155368 | 341  | 4.7926955  | 0.00435299 | 4756 4320     | FLJ32063 SATB2    |        | 3p 5m    |
| MspFrag62271  | 8  | 23620226  | 23620535  | 309  | 4.78154538 | 0.00463737 |               |                   |        |          |
| MspFrag17091  | 2  | 65021553  | 65022078  | 525  | -5.068605  | 0.00466788 |               |                   |        |          |
| MspFrag15992  | 2  | 37335951  | 37336386  | 435  | 4.76160222 | 0.00466788 |               |                   |        |          |
| MspFrag19993  | 2  | 121758817 | 121758866 | 49   | 4.73302384 | 0.00466788 | 139           | TFCP2L1           |        | 3m       |
| MspFrag37665  | 4  | 191237024 | 191237117 | 93   | -4.8605092 | 0.00466788 | 5             | FRG1              |        | 3p       |
| MspFrag54511  | 7  | 26986884  | 26987385  | 501  | 4.86050919 | 0.00466788 | -222 -279     | HOXA10 HOXA10     |        | in in    |
| MspFrag89236  | 11 | 124093555 | 124093621 | 66   | 4.86050919 | 0.00466788 |               |                   |        |          |
| MspFrag36662  | 4  | 154574686 | 154576114 | 1428 | 4.7334173  | 0.00466788 |               |                   |        |          |
| MspFrag67634  | 9  | 6402698   | 6403109   | 411  | 4.7334173  | 0.00466788 | 41            | UHRF2             |        | 3p       |
| MspFrag93105  | 12 | 63801376  | 63801660  | 284  | 4.7334173  | 0.00466788 | 20            | WIF1              |        | 5m       |
| MspFrag3879   | 1  | 25503153  | 25503182  | 29   | 4.73297298 | 0.00466788 | 1154          | AK127547          |        | 5m       |
| MspFrag92792  | 12 | 55916526  | 55916826  | 300  | 4.79390143 | 0.00469301 |               |                   |        |          |
| MspFrag145635 | 20 | 54634119  | 54634316  | 197  | 4.77791051 | 0.00477342 | 3448          | TFAP2C            |        | 3p       |
| MspFrag157877 | 23 | 139312134 | 139312402 | 268  | 4.76771182 | 0.00477875 | 343           | SOX3              |        | 3m       |
| MspFrag65903  | 8  | 142699372 | 142699462 | 90   | -4.734892  | 0.00479889 |               |                   |        |          |
| MspFrag107966 | 15 | 72445132  | 72445218  | 86   | 4.79343145 | 0.004814   | 1802          | CYP11A1           |        | 3m       |
| MspFrag91783  | 12 | 47661413  | 47661765  | 352  | 4.74893695 | 0.004814   |               |                   |        |          |
| MspFrag130480 | 18 | 75258411  | 75258747  | 336  | 5.10756049 | 0.004814   | 2566 1652     | NFATC1 NFATC1     |        | 3p 5p    |
| MspFrag19404  | 2  | 111592480 | 111592646 | 166  | 4.78373207 | 0.004814   | 4894 4487     | BCL2L11 FLJ44006  |        | 3p 5m    |
| MspFrag54961  | 7  | 35066328  | 35066690  | 362  | 4.73197776 | 0.004814   | -208 -154     | TBX20 TBX20       |        | in in    |
| MspFrag40765  | 5  | 76362340  | 76363310  | 970  | 4.72891071 | 0.00482383 | 304           | U84971            |        | 5p       |
| MspFrag121375 | 17 | 32366554  | 32366852  | 298  | 4.8850339  | 0.00490786 | 1759          | LHX1              |        | 3p       |
| MspFrag56182  | 7  | 69604010  | 69604081  | 71   | 4.81329062 | 0.005055   |               |                   |        |          |
| MspFrag76467  | 10 | 44201213  | 44201571  | 358  | 4.74026325 | 0.00513016 | 662           | CXCL12            |        | 5m       |
| MspFrag63172  | 8  | 43220694  | 43220809  | 115  | 4.77564785 | 0.00513016 |               |                   |        |          |
| MspFrag9487   | 1  | 147792977 | 147793918 | 941  | -4.7226401 | 0.00513016 | -620 108 -321 | AK125959 AF123538 |        | in 3p in |
| MspFrag87584  | 11 | 74914760  | 74914943  | 183  | -4.7452946 | 0.00513016 | 245           | GDPD5             |        | 5m       |
| MspFrag45817  | 6  | 5952463   | 5952782   | 319  | 4.74529455 | 0.00513016 | -150 -169     | NRN1 NRN1         |        | in in    |
| MspFrag8591   | 1  | 113210617 | 113210679 | 62   | 4.70992691 | 0.00513016 | 168           | SLC16A1           |        | 3m       |
| MspFrag70823  | 9  | 107331804 | 107331853 | 49   | 4.70992691 | 0.00513016 | 494           | KLF4              |        | 5m       |
| MspFrag152672 | 22 | 47292494  | 47292655  | 161  | 4.70992691 | 0.00513016 |               |                   |        |          |
| MspFrag70197  | 9  | 95353357  | 95353959  | 602  | 4.70992691 | 0.00513016 | 2971          | PTCH              |        | 5m       |
| MspFrag78459  | 10 | 94818595  | 94819019  | 424  | 4.68929407 | 0.00520771 | 4202          | CYP26A1           |        | 3p       |
| MspFrag113471 | 16 | 29583516  | 29583780  | 264  | 4.69076999 | 0.00529112 | 1437          | SPN               |        | 5p       |
| MspFrag138731 | 19 | 45752216  | 45752360  | 144  | 4.67763696 | 0.00531558 |               |                   |        |          |
| MspFrag17683  | 2  | 73431466  | 73431976  | 510  | 4.77032697 | 0.00531723 | 289           | EGR4              |        | 3m       |
| MspFrag16326  | 2  | 45068643  | 45068939  | 296  | 4.75263361 | 0.00535807 |               |                   |        |          |
| MspFrag42574  | 5  | 137253000 | 137253325 | 325  | 4.69686614 | 0.00545766 | -272 -53      | PKD2L2 PKD2L2     |        | in in    |
| MspFrag93345  | 12 | 70519326  | 70519688  | 362  | 4.66172647 | 0.0055880  | 117           | AK022147          |        | 3p       |
| MspFrag34945  | 4  | 81476377  | 81476659  | 282  | 4.69013535 | 0.00559314 | 541           | PRDM8             |        | 5p       |
| MspFrag21377  | 2  | 172791492 | 172791741 | 249  | 4.7827164  | 0.00561586 | 1032          | DLX2              |        | 3m       |
| MspFrag10500  | 1  | 158248482 | 158249002 | 520  | 4.70734734 | 0.00564967 |               |                   |        |          |
| MspFrag33174  | 4  | 10138930  | 10139312  | 382  | 4.77902156 | 0.00569657 | 3629          | KIAA1729          |        | 5m       |
| MspFrag38624  | 5  | 1928483   | 1928659   | 176  | 4.64857966 | 0.00574671 |               |                   |        |          |
| MspFrag75744  | 10 | 27429398  | 27430215  | 817  | 4.64857966 | 0.00574671 | -804 -13      | ANKRD26 ANKRD26   |        | in in    |
| MspFrag89478  | 11 | 128266372 | 128266423 | 51   | 4.64857966 | 0.00574671 | 99            | KCNJ5             |        | 3p       |
| MspFrag130354 | 18 | 74775130  | 74775292  | 162  | -4.6485797 | 0.00574671 |               |                   |        |          |
| MspFrag63175  | 8  | 43221273  | 43221557  | 284  | 4.651794   | 0.00577616 |               |                   |        |          |
| MspFrag145647 | 20 | 54635914  | 54636293  | 379  | 4.6526386  | 0.00577616 | 1471          | TFAP2C            |        | 3p       |
| MspFrag1007   | 1  | 2254652   | 2255032   | 380  | 4.74274784 | 0.00582004 |               |                   |        |          |
| MspFrag16621  | 2  | 48453613  | 48453671  | 58   | 4.74274784 | 0.00582004 | 93            | HTLF              |        | 5p       |
| MspFrag36288  | 4  | 141014354 | 141014501 | 147  | 4.74274784 | 0.00582004 |               |                   |        |          |
| MspFrag410    | 1  | 1188777   | 1189026   | 249  | 4.65130367 | 0.00582004 | 409           | TNFRSF4           |        | 3m       |
| MspFrag58714  | 7  | 128359411 | 128360286 | 875  | 4.67553917 | 0.00582004 | 36            | BC067760          |        | 3p       |
| MspFrag1311   | 1  | 3036436   | 3036818   | 382  | -4.6464075 | 0.00584718 |               |                   |        |          |
| MspFrag154657 | 23 | 30086153  | 30086402  | 249  | 4.6375929  | 0.00587511 | 747           | NROB1             |        | 3m       |
| MspFrag118488 | 17 | 3262975   | 3263712   | 737  | -4.6366664 | 0.00592156 |               |                   |        |          |
| MspFrag60303  | 7  | 155932220 | 155932487 | 267  | 4.70965169 | 0.00594549 | 105 389       | C7orf13 RNF32     |        | 3m 3p    |
| MspFrag40818  | 5  | 76968250  | 76968525  | 275  | 4.65157453 | 0.00596337 | 1753          | OTP               |        | 3m       |

|               |    |           |           |      |            |            |              |                    |          |
|---------------|----|-----------|-----------|------|------------|------------|--------------|--------------------|----------|
| MspFrag128151 | 18 | 14368579  | 14368756  | 177  | -4.6279428 | 0.00596337 |              |                    |          |
| MspFrag153561 | 23 | 396487    | 396773    | 286  | -4.6279428 | 0.00596337 |              |                    |          |
| MspFrag121549 | 17 | 33919151  | 33919636  | 485  | 4.6535078  | 0.00596337 |              |                    |          |
| MspFrag115867 | 16 | 67977136  | 67977150  | 14   | 4.65044386 | 0.00596337 | 224          | TERF2              | 3m       |
| MspFrag122388 | 17 | 39556671  | 39556860  | 189  | -4.6504439 | 0.00596337 | 131          | HDAC5              | 5m       |
| MspFrag7466   | 1  | 85070648  | 85070704  | 56   | 4.62679497 | 0.00596337 |              |                    |          |
| MspFrag77976  | 10 | 81957375  | 81957655  | 280  | 4.62679497 | 0.00596337 | 2067         | ANXA11             | 5m       |
| MspFrag126707 | 17 | 77479125  | 77479188  | 63   | 4.62679497 | 0.00596337 | 246          | MAFG               | 5m       |
| MspFrag140273 | 19 | 54032435  | 54032522  | 87   | 4.62679497 | 0.00596337 | 689          | DHRS10             | 5m       |
| MspFrag103889 | 14 | 101120571 | 101120757 | 186  | 4.74240899 | 0.00596337 |              |                    |          |
| MspFrag75336  | 10 | 17699519  | 17700196  | 677  | 4.64328129 | 0.00596337 | 140          | PTPLA              | 5m       |
| MspFrag114045 | 16 | 31406129  | 31406304  | 175  | 4.64328129 | 0.00596337 |              |                    |          |
| MspFrag146408 | 20 | 61109010  | 61109236  | 226  | 4.62354059 | 0.00596337 | 1943         | AK128329           | 3p       |
| MspFrag5104   | 1  | 37589882  | 37590168  | 286  | 4.62718391 | 0.00597157 |              |                    |          |
| MspFrag138648 | 19 | 45421947  | 45422225  | 278  | 4.80773888 | 0.00597973 |              |                    |          |
| MspFrag132344 | 19 | 1798076   | 1798768   | 692  | -4.6348422 | 0.00600066 | 682          | TCEB3BP1           | 3m       |
| MspFrag46923  | 6  | 30019092  | 30019344  | 252  | 4.66598719 | 0.00600066 | 783          | HLA-A              | 5p       |
| MspFrag78787  | 10 | 101078818 | 101079066 | 248  | 4.66598719 | 0.00600066 | 956          | CNNM1              | 3p       |
| MspFrag89222  | 11 | 123811259 | 123816128 | 4869 | -4.7344517 | 0.00600066 | 63           | OR8B8              | 3m       |
| MspFrag145950 | 20 | 57373874  | 57374186  | 312  | -4.9056403 | 0.00600066 |              |                    |          |
| MspFrag4448   | 1  | 30407538  | 30407813  | 275  | 4.65274593 | 0.00600411 |              |                    |          |
| MspFrag26491  | 3  | 48607254  | 48607482  | 228  | 4.67449128 | 0.00600411 | 207          | COL7A1             | 3m       |
| MspFrag43442  | 5  | 148631114 | 148631272 | 158  | 4.67449128 | 0.00600411 | 354          | BC040723           | 3p       |
| MspFrag44758  | 5  | 178300423 | 178300651 | 228  | 4.67449128 | 0.00600411 | 178          | ZNF454             | 3p       |
| MspFrag92453  | 12 | 52665711  | 52666099  | 388  | 4.89088164 | 0.00600411 | 491          | HOXC10             | 5p       |
| MspFrag98758  | 13 | 95003002  | 95003447  | 445  | 4.61533931 | 0.00604161 | 42           | CLDN10             | 5p       |
| MspFrag154465 | 23 | 23109703  | 23110024  | 321  | 4.61533931 | 0.00604161 | 1764         | BC062344           | 3p       |
| MspFrag145069 | 20 | 43952201  | 43952384  | 183  | 4.6526386  | 0.00608752 | 924 986 2556 | NEURL2 AB209705 C  | 3m 3p 5m |
| MspFrag65671  | 8  | 135560191 | 135560433 | 242  | -4.6186426 | 0.00621677 |              |                    |          |
| MspFrag34442  | 4  | 57363011  | 57363188  | 177  | 4.74209778 | 0.00623784 |              |                    |          |
| MspFrag91117  | 12 | 29433974  | 29440453  | 6479 | 4.64984686 | 0.00632993 |              |                    |          |
| MspFrag122226 | 17 | 38189864  | 38189971  | 107  | 4.61407433 | 0.00637232 | 712          | AK096052           | 5p       |
| MspFrag133347 | 19 | 3736828   | 3736925   | 97   | 4.59300588 | 0.00641384 | 489          | MATK               | 3m       |
| MspFrag145995 | 20 | 58536847  | 58537548  | 701  | -4.6964001 | 0.00641384 |              |                    |          |
| MspFrag47269  | 6  | 32058893  | 32059725  | 832  | -4.6546063 | 0.0064869  | 1081         | C4B                | 5p       |
| MspFrag27268  | 3  | 55492383  | 55492977  | 594  | 4.59450739 | 0.00650933 |              |                    |          |
| MspFrag45322  | 6  | 1258218   | 1258600   | 382  | 4.71389432 | 0.00650933 | 544          | FOXQ1              | 5p       |
| MspFrag127607 | 18 | 5881053   | 5881153   | 100  | 4.71389432 | 0.00650933 |              |                    |          |
| MspFrag10162  | 1  | 153596335 | 153596875 | 540  | 4.62225729 | 0.00651734 |              |                    |          |
| MspFrag124886 | 17 | 69954528  | 69954819  | 291  | 4.66547587 | 0.00661375 |              |                    |          |
| MspFrag157704 | 23 | 134296622 | 134296822 | 200  | -4.5809924 | 0.00663085 |              |                    |          |
| MspFrag33930  | 4  | 41590250  | 41590521  | 271  | 4.62206268 | 0.00663085 | 1394         | PHOX2B             | 3m       |
| MspFrag54559  | 7  | 27018371  | 27019183  | 812  | 4.59338558 | 0.00663085 |              |                    |          |
| MspFrag15324  | 2  | 25266052  | 25266339  | 287  | 4.6394819  | 0.00663085 |              |                    |          |
| MspFrag107908 | 15 | 72077340  | 72077625  | 285  | 4.73181487 | 0.00664306 | -215 -70     | M82829 M82829      | in in    |
| MspFrag35222  | 4  | 89654226  | 89657223  | 2997 | -4.5956944 | 0.00664306 | -30 -2967    | BC042047 BC042047  | in in    |
| MspFrag145698 | 20 | 55275478  | 55275807  | 329  | 4.57600675 | 0.00675773 | 386          | BC004248           | 5m       |
| MspFrag69100  | 9  | 68147738  | 68147938  | 200  | 4.57792667 | 0.00675773 | 402          | FOXD4L3            | 5p       |
| MspFrag33464  | 4  | 19933076  | 19941950  | 8874 | 4.83735465 | 0.00675773 | 1369         | SLIT2              | 5p       |
| MspFrag102260 | 14 | 68798095  | 68798747  | 652  | 4.69705108 | 0.00676223 | 1413         | GALNTL1            | 5p       |
| MspFrag105073 | 15 | 21393177  | 21393796  | 619  | -4.5681827 | 0.00677481 |              |                    |          |
| MspFrag92865  | 12 | 56307980  | 56308295  | 315  | 4.60475358 | 0.00677481 | 1120         | AK127448           | 3m       |
| MspFrag100885 | 14 | 36063455  | 36063725  | 270  | 4.58335823 | 0.00682257 | 4340         | BC006221           | 5m       |
| MspFrag120745 | 17 | 24917063  | 24917287  | 224  | 4.59174647 | 0.00695127 | 887 2577     | LOC116236 BC001593 | 3m 3p    |
| MspFrag27953  | 3  | 87359173  | 87359320  | 147  | 4.56442279 | 0.00707448 | -34 -113     | CHMP2B CHMP2B      | in in    |
| MspFrag62984  | 8  | 41285465  | 41285513  | 48   | 4.55026395 | 0.00714109 | 624 1799     | SFRP1 AK127331     | 3m 5m    |
| MspFrag10429  | 1  | 158233267 | 158233568 | 301  | 4.70763111 | 0.00722032 |              |                    |          |
| MspFrag10498  | 1  | 158248058 | 158248359 | 301  | 4.70763111 | 0.00722032 |              |                    |          |
| MspFrag152537 | 22 | 45293600  | 45293616  | 16   | 4.70763111 | 0.00722032 |              |                    |          |
| MspFrag141068 | 19 | 58137090  | 58137156  | 66   | 4.54928503 | 0.00725847 | 494          | BC046449           | 3m       |
| MspFrag82654  | 11 | 2002464   | 2002798   | 334  | -4.5434802 | 0.00728227 |              |                    |          |
| MspFrag24814  | 3  | 9962469   | 9963207   | 738  | 4.73362702 | 0.00740233 |              |                    |          |
| MspFrag97437  | 13 | 34942855  | 34943150  | 295  | 4.5356221  | 0.00740233 |              |                    |          |
| MspFrag46023  | 6  | 10490288  | 10490775  | 487  | 4.58008818 | 0.00740233 |              |                    |          |

|               |    |           |           |     |            |            |           |                   |       |
|---------------|----|-----------|-----------|-----|------------|------------|-----------|-------------------|-------|
| MspFrag113091 | 16 | 23220108  | 23221030  | 922 | 4.53545405 | 0.00740233 | 110       | SCNN1B            | 3p    |
| MspFrag92237  | 12 | 50913530  | 50913916  | 386 | 4.60928203 | 0.00748304 | 310       | KRT7              | 5p    |
| MspFrag137388 | 19 | 38481588  | 38481818  | 230 | 4.58007423 | 0.00748304 |           |                   |       |
| MspFrag99294  | 13 | 109236846 | 109236895 | 49  | 4.5327563  | 0.00748304 | 20        | IRS2              | 3m    |
| MspFrag20092  | 2  | 127767972 | 127768694 | 722 | 4.5300388  | 0.00748304 | -712 -10  | ERCC3 ERCC3       | in in |
| MspFrag145777 | 20 | 56237449  | 56238053  | 604 | 4.52628786 | 0.00755595 | 358       | C20orf86          | 5m    |
| MspFrag138225 | 19 | 43439132  | 43439444  | 312 | 4.5927606  | 0.00755595 | 120       | PPP1R14A          | 5m    |
| MspFrag43202  | 5  | 140777723 | 140778009 | 286 | 4.52389116 | 0.00760232 | 2711 258  | PCDHGA11 PCDHGB7  | 3p 5p |
| MspFrag142315 | 20 | 225237    | 225931    | 694 | 4.52522137 | 0.00761246 | 272       | ZCCHC3            | 3p    |
| MspFrag49705  | 6  | 101019339 | 101019542 | 203 | 4.52129571 | 0.00761246 | 1067      | SIM1              | 5m    |
| MspFrag92375  | 12 | 52173074  | 52173130  | 56  | 4.52129571 | 0.00761246 |           |                   |       |
| MspFrag122178 | 17 | 38076104  | 38076205  | 101 | 4.52129571 | 0.00761246 |           |                   |       |
| MspFrag125778 | 17 | 74718816  | 74719029  | 213 | -4.5145195 | 0.00777904 |           |                   |       |
| MspFrag111276 | 16 | 2138492   | 2138584   | 92  | 4.51551006 | 0.00777904 | 67        | RAB26             | 3p    |
| MspFrag117733 | 16 | 88468140  | 88468497  | 357 | 4.51551006 | 0.00777904 | 591       | AK024679          | 5p    |
| MspFrag118084 | 17 | 1335766   | 1335796   | 30  | 4.51551006 | 0.00777904 |           |                   |       |
| MspFrag25485  | 3  | 27731217  | 27731509  | 292 | 4.52253067 | 0.0078083  |           |                   |       |
| MspFrag56301  | 7  | 72162485  | 72162634  | 149 | 4.85050849 | 0.00786176 |           |                   |       |
| MspFrag110170 | 16 | 518982    | 519368    | 386 | 4.76724435 | 0.00787527 | 1126      | SOLH              | 5p    |
| MspFrag32643  | 4  | 3804868   | 3804896   | 28  | 4.6105692  | 0.00798905 | 470       | ADRA2C            | 5p    |
| MspFrag70339  | 9  | 96719282  | 96719517  | 235 | 4.5360573  | 0.0079985  |           |                   |       |
| MspFrag80310  | 10 | 122729002 | 122729197 | 195 | 4.56243385 | 0.00801638 |           |                   |       |
| MspFrag2123   | 1  | 9031495   | 9031958   | 463 | 4.50804116 | 0.00801638 |           |                   |       |
| MspFrag21270  | 2  | 171505783 | 171506051 | 268 | 4.51403995 | 0.00801638 |           |                   |       |
| MspFrag78975  | 10 | 102465102 | 102465383 | 281 | 4.50553306 | 0.00803917 |           |                   |       |
| MspFrag38880  | 5  | 3651811   | 3652405   | 594 | 4.5341243  | 0.0081998  |           |                   |       |
| MspFrag113959 | 16 | 31027539  | 31027593  | 54  | 4.49277136 | 0.00821185 | 287       | BC009872          | 5p    |
| MspFrag39348  | 5  | 17544469  | 17544634  | 165 | 4.49230417 | 0.00822984 |           |                   |       |
| MspFrag76500  | 10 | 45234069  | 45234384  | 315 | 4.56703324 | 0.0083059  |           |                   |       |
| MspFrag142458 | 20 | 773559    | 773845    | 286 | 4.53966815 | 0.00841337 | 241       | C20orf55          | 5p    |
| MspFrag20467  | 2  | 131944846 | 131944896 | 50  | 4.59461749 | 0.00841337 |           |                   |       |
| MspFrag43627  | 5  | 153806233 | 153806317 | 84  | 4.59461749 | 0.00841337 | 458       | SAP30L            | 5p    |
| MspFrag114237 | 16 | 33264601  | 33264651  | 50  | 4.59461749 | 0.00841337 |           |                   |       |
| MspFrag127418 | 18 | 2836974   | 2837028   | 54  | 4.59461749 | 0.00841337 | -1 -53    | EMILIN2 EMILIN2   | in in |
| MspFrag29141  | 3  | 130480855 | 130480921 | 66  | 4.52156602 | 0.00855171 | 341       | DC12              | 5p    |
| MspFrag65321  | 8  | 121205133 | 121205730 | 597 | 4.51397693 | 0.00855171 | 802       | COL14A1           | 3p    |
| MspFrag41209  | 5  | 92949249  | 92949472  | 223 | 4.57883038 | 0.00867547 |           |                   |       |
| MspFrag43024  | 5  | 140326697 | 140326755 | 58  | 4.53313858 | 0.00867547 | 162       | PCDHAC2           | 5p    |
| MspFrag121580 | 17 | 33988254  | 33988467  | 213 | 4.52997342 | 0.00867547 |           |                   |       |
| MspFrag55720  | 7  | 55947962  | 55948223  | 261 | 4.47833365 | 0.00867547 | 173       | CHCHD2            | 3m    |
| MspFrag77834  | 10 | 79140972  | 79141071  | 99  | 4.47833365 | 0.00867547 |           |                   |       |
| MspFrag124167 | 17 | 57572459  | 57572737  | 278 | 4.47833365 | 0.00867547 |           |                   |       |
| MspFrag144911 | 20 | 42272615  | 42272665  | 50  | 4.47833365 | 0.00867547 | 180       | C20orf111         | 3m    |
| MspFrag117750 | 16 | 88519308  | 88519772  | 464 | 4.47248427 | 0.00867547 |           |                   |       |
| MspFrag54400  | 7  | 26916475  | 26916913  | 438 | 4.46990157 | 0.00872552 | 841       | HOXA2             | 5m    |
| MspFrag156884 | 23 | 113638778 | 113639163 | 385 | 4.49618553 | 0.0087603  | 2367      | HTR2C             | 3p    |
| MspFrag151442 | 22 | 37421867  | 37422481  | 614 | 4.62270444 | 0.00890481 | 3987 1098 | BC014075 KIAA0063 | 3p 5m |
| MspFrag86819  | 11 | 67139458  | 67140215  | 757 | 4.54523716 | 0.00891757 | 213       | AK124982          | 5m    |
| MspFrag129629 | 18 | 55086514  | 55086953  | 439 | 4.45801223 | 0.00891757 |           |                   |       |
| MspFrag6246   | 1  | 47616320  | 47616401  | 81  | 4.4854911  | 0.00891757 |           |                   |       |
| MspFrag72615  | 9  | 131181017 | 131181465 | 448 | 4.4854911  | 0.00891757 | -5 -443   | C9orf59 C9orf59   | in in |
| MspFrag71581  | 9  | 124112526 | 124112954 | 428 | -4.6018522 | 0.00891757 |           |                   |       |
| MspFrag43191  | 5  | 140768066 | 140768556 | 490 | 4.45614323 | 0.00891757 | 4370 113  | PCDHGA10 PCDHGB6  | 3p 5p |
| MspFrag46019  | 6  | 10489684  | 10489955  | 271 | 4.45500382 | 0.00891757 |           |                   |       |
| MspFrag30722  | 3  | 185461595 | 185461842 | 247 | 4.45697654 | 0.00891757 | 111       | CAM-KIIN          | 3m    |
| MspFrag57514  | 7  | 99816533  | 99816582  | 49  | 4.45697654 | 0.00891757 |           |                   |       |
| MspFrag72610  | 9  | 131029567 | 131030448 | 881 | 4.45697654 | 0.00891757 | 86        | NUP214            | 3p    |
| MspFrag75147  | 10 | 13382079  | 13382130  | 51  | 4.45697654 | 0.00891757 | -23 -28   | PHYH PHYH         | in in |
| MspFrag91985  | 12 | 48635410  | 48635566  | 156 | 4.45697654 | 0.00891757 |           |                   |       |
| MspFrag115480 | 16 | 65870612  | 65870704  | 92  | 4.45697654 | 0.00891757 | 947       | PLEKHG4           | 5p    |
| MspFrag148035 | 21 | 38954880  | 38955184  | 304 | 4.45697654 | 0.00891757 | 304       | AY204741          | 3m    |
| MspFrag152497 | 22 | 45251398  | 45251531  | 133 | -4.4569765 | 0.00891757 |           |                   |       |
| MspFrag121583 | 17 | 33988692  | 33989109  | 417 | 4.45469931 | 0.00902498 |           |                   |       |
| MspFrag19009  | 2  | 104928945 | 104929619 | 674 | 4.4683926  | 0.00905004 | 867       | POU3F3            | 3p    |

|               |    |           |           |      |            |            |               |  |                   |          |
|---------------|----|-----------|-----------|------|------------|------------|---------------|--|-------------------|----------|
| MspFrag134339 | 19 | 7652614   | 7653071   | 457  | 4.4683926  | 0.00905004 | 854           |  | TRAPPC5           | 5p       |
| MspFrag10446  | 1  | 158238284 | 158238491 | 207  | 4.69391775 | 0.00909243 |               |  |                   |          |
| MspFrag157039 | 23 | 114816966 | 114817094 | 128  | -4.4424998 | 0.00922226 |               |  |                   |          |
| MspFrag152094 | 22 | 41917375  | 41918092  | 717  | 4.71211319 | 0.00930131 | 1677          |  | AK055463          | 3m       |
| MspFrag80108  | 10 | 119287515 | 119287949 | 434  | 4.52445792 | 0.00930131 | 3996          |  | EMX2              | 3p       |
| MspFrag77199  | 10 | 69760469  | 69761198  | 729  | 4.4875392  | 0.00933293 | 1457 -262 -46 |  | AK027673 HNRPH3 H | 3m in in |
| MspFrag21263  | 2  | 171504507 | 171504908 | 401  | 4.44133937 | 0.00933293 |               |  |                   |          |
| MspFrag154467 | 23 | 23110532  | 23111089  | 557  | 4.44133937 | 0.00933293 | 699           |  | BC062344          | 3p       |
| MspFrag37048  | 4  | 174825389 | 174825457 | 68   | 4.47714112 | 0.00944667 | 80            |  | HAND2             | 5m       |
| MspFrag53348  | 7  | 5002737   | 5003007   | 270  | 4.47714112 | 0.00944667 | 68            |  | WIPI-2            | 3p       |
| MspFrag93415  | 12 | 74712530  | 74712745  | 215  | 4.47714112 | 0.00944667 | 582           |  | PHLDA1            | 5m       |
| MspFrag98941  | 13 | 99345412  | 99345884  | 472  | 4.47714112 | 0.00944667 |               |  |                   |          |
| MspFrag143572 | 20 | 21324892  | 21325111  | 219  | 4.47714112 | 0.00944667 |               |  |                   |          |
| MspFrag4618   | 1  | 32314835  | 32314891  | 56   | 4.60515125 | 0.00944667 | 398           |  | DKFzp451J0118     | 5p       |
| MspFrag17733  | 2  | 74286569  | 74286638  | 69   | 4.47406373 | 0.00956108 |               |  |                   |          |
| MspFrag148833 | 21 | 45753853  | 45753890  | 37   | 4.47406373 | 0.00956108 |               |  |                   |          |
| MspFrag49556  | 6  | 99374654  | 99379207  | 4553 | -4.4740637 | 0.00956108 |               |  |                   |          |
| MspFrag154250 | 23 | 17432952  | 17433180  | 228  | 4.47406373 | 0.00956108 |               |  |                   |          |
| MspFrag70644  | 9  | 100252347 | 100253621 | 1274 | -4.4422693 | 0.00956108 |               |  |                   |          |
| MspFrag41887  | 5  | 122458390 | 122458697 | 307  | 4.52059322 | 0.00956108 |               |  |                   |          |
| MspFrag22969  | 2  | 220174592 | 220174809 | 217  | -4.4386189 | 0.00956108 |               |  |                   |          |
| MspFrag54471  | 7  | 26969429  | 26969667  | 238  | 4.43861891 | 0.00956108 | -131 -107     |  | HOXA7 HOXA7       | in in    |
| MspFrag58370  | 7  | 121378267 | 121378399 | 132  | -4.4386189 | 0.00956108 |               |  |                   |          |
| MspFrag98896  | 13 | 98536336  | 98536409  | 73   | 4.43861891 | 0.00956108 |               |  |                   |          |
| MspFrag123487 | 17 | 45858491  | 45858571  | 80   | 4.43861891 | 0.00956108 | 26            |  | FLJ20920          | 3p       |
| MspFrag112375 | 16 | 11164368  | 11165128  | 760  | -4.4195928 | 0.00960523 |               |  |                   |          |
| MspFrag134925 | 19 | 10485652  | 10485853  | 201  | 4.43938077 | 0.00961225 |               |  |                   |          |
| MspFrag12613  | 1  | 223231308 | 223231522 | 214  | 4.46693916 | 0.00963277 | 408           |  | ITPKB             | 3m       |
| MspFrag132886 | 19 | 2564724   | 2564997   | 273  | 4.79416237 | 0.00963277 |               |  |                   |          |
| MspFrag69976  | 9  | 93159730  | 93160221  | 491  | 4.46135189 | 0.00963277 |               |  |                   |          |
| MspFrag100862 | 14 | 36057590  | 36057824  | 234  | 4.41619398 | 0.00966918 | 544 447       |  | D50741 BX161496   | 3m 3p    |
| MspFrag63536  | 8  | 57287478  | 57287948  | 470  | 4.65474668 | 0.00976309 | 1086 567      |  | PLAG1 CHCHD7      | 5m 5p    |
| MspFrag45141  | 5  | 180457219 | 180457300 | 81   | 4.40567356 | 0.00994819 |               |  |                   |          |
| MspFrag123469 | 17 | 45777586  | 45778087  | 501  | 4.40791759 | 0.00995098 | 304           |  | XYLT2             | 3p       |
| MspFrag72190  | 9  | 128628906 | 128628954 | 48   | 4.426185   | 0.00997532 | 210           |  | TBC1D13           | 3p       |
| MspFrag11381  | 1  | 196735881 | 196736469 | 588  | 4.40217861 | 0.010022   |               |  |                   |          |
| MspFrag6123   | 1  | 46626236  | 46626315  | 79   | 4.44324583 | 0.01004935 |               |  |                   |          |
| MspFrag89299  | 11 | 124244154 | 124244572 | 418  | 4.46287762 | 0.01004935 |               |  |                   |          |
| MspFrag54463  | 7  | 26963821  | 26964204  | 383  | 4.63866806 | 0.01014669 | 3213          |  | HOXA6             | 5m       |
| MspFrag80632  | 10 | 126702172 | 126702601 | 429  | -4.6326777 | 0.01015357 |               |  |                   |          |
| MspFrag110848 | 16 | 1408921   | 1409435   | 514  | 4.43382709 | 0.01020881 | 4223          |  | BC011924          | 5m       |
| MspFrag133652 | 19 | 4522692   | 4523044   | 352  | 4.6258221  | 0.01022756 |               |  |                   |          |
| MspFrag48073  | 6  | 41622922  | 41622979  | 57   | 4.454861   | 0.01022756 | 781           |  | FOXP4             | 5p       |
| MspFrag62223  | 8  | 23316445  | 23316643  | 198  | 4.454861   | 0.01022756 | 932           |  | LOXL2             | 3m       |
| MspFrag77852  | 10 | 79714238  | 79714714  | 476  | 4.53186663 | 0.01027931 |               |  |                   |          |
| MspFrag37688  | 4  | 191314982 | 191315040 | 58   | -4.4122386 | 0.01027931 |               |  |                   |          |
| MspFrag28840  | 3  | 127880443 | 127880837 | 394  | 4.40364328 | 0.01027931 |               |  |                   |          |
| MspFrag17861  | 2  | 74653979  | 74654303  | 324  | 4.39524314 | 0.01027931 | 714           |  | TLX2              | 5p       |
| MspFrag105035 | 15 | 20666836  | 20667114  | 278  | 4.39524314 | 0.01027931 |               |  |                   |          |
| MspFrag125647 | 17 | 73822060  | 73822287  | 227  | 4.40120093 | 0.01032669 |               |  |                   |          |
| MspFrag148183 | 21 | 42057736  | 42059425  | 1689 | 4.47501162 | 0.01033268 | 893           |  | RIPK4             | 3m       |
| MspFrag108483 | 15 | 77391052  | 77391953  | 901  | 4.40767104 | 0.01033507 | 497           |  | AK075529          | 5p       |
| MspFrag146460 | 20 | 61279714  | 61279991  | 277  | 4.41424554 | 0.01041351 |               |  |                   |          |
| MspFrag44117  | 5  | 172604897 | 172605478 | 581  | 4.44242848 | 0.01055257 |               |  |                   |          |
| MspFrag49963  | 6  | 108594677 | 108595291 | 614  | 4.44242848 | 0.01055257 | 628 723       |  | AK131541 NR2E1    | 3p 5p    |
| MspFrag4589   | 1  | 32073266  | 32073942  | 676  | 4.56761392 | 0.0105832  | 218           |  | PTP4A2            | 5m       |
| MspFrag116191 | 16 | 73706120  | 73706426  | 306  | 4.79319137 | 0.0105832  | 1740          |  | LDHD              | 3m       |
| MspFrag56856  | 7  | 84459865  | 84460029  | 164  | 4.45125783 | 0.01060774 |               |  |                   |          |
| MspFrag80871  | 10 | 131651013 | 131651477 | 464  | 4.42831706 | 0.01060774 | 531           |  | EBF3              | 3m       |
| MspFrag6605   | 1  | 53704120  | 53704357  | 237  | -4.3750317 | 0.01060774 |               |  |                   |          |
| MspFrag93562  | 12 | 84176950  | 84177111  | 161  | 4.37503169 | 0.01060774 | 598           |  | CART1             | 5p       |
| MspFrag34475  | 4  | 57816721  | 57817091  | 370  | 4.41295428 | 0.01075283 | 376           |  | IGFBP7            | 3m       |
| MspFrag20521  | 2  | 132264545 | 132265187 | 642  | 4.5685089  | 0.01090939 |               |  |                   |          |
| MspFrag44618  | 5  | 177143023 | 177143232 | 209  | 4.48623756 | 0.01092896 | 2740          |  | NY-REN-7          | 5m       |

|               |    |         |         |     |            |            |  |  |  |
|---------------|----|---------|---------|-----|------------|------------|--|--|--|
| MspFrag142722 | 20 | 3021000 | 3021285 | 285 | 4.48623756 | 0.01092896 |  |  |  |
|---------------|----|---------|---------|-----|------------|------------|--|--|--|

Supplemental Table 4

| <b>Factor</b>                                  | <b>Cox Coefficient</b> | <b>Hazard Ratio</b> | <b>P-value</b> |
|------------------------------------------------|------------------------|---------------------|----------------|
| Lymph Node Status (Positive vs Negative)       | 1.47                   | 4.34                | 0.0011         |
| Tumor Size Category (All vs pT1)               | 0.782                  | 2.19                | 0.037          |
| Tumor Grade (II vs I)                          | 1.43                   | 4.18                | 0.17           |
| Tumor Grade (III vs I)                         | 2.12                   | 8.33                | 0.039          |
| Hormone Receptor Status (Positive vs Negative) | -0.368                 | 0.692               | 0.29           |
| ERBB2 Status (Positive vs Negative)            | -0.159                 | 0.853               | 0.71           |
| Systemic adjuvant Therapy (Yes vs No)          | 0.547                  | 1.73                | 0.16           |
| Hormone Therapy (Yes vs No)                    | 0.435                  | 1.55                | 0.21           |
| Age (>55)                                      | -0.155                 | 0.857               | 0.65           |















|               |    |           |           |       |             |             |              |
|---------------|----|-----------|-----------|-------|-------------|-------------|--------------|
| MspFrag69701  | 9  | 87781855  | 87782335  | 480   | 0.007547103 | 2.496015315 | Methylated   |
| MspFrag69851  | 9  | 91742323  | 91744679  | 2356  | 0.00210051  | 2.733190024 | Methylated   |
| MspFrag70151  | 9  | 95112194  | 95113865  | 1671  | 0.005949673 | 2.580434754 | Methylated   |
| MspFrag70163  | 9  | 95190111  | 95191116  | 1005  | 0.004253544 | 2.55802515  | Methylated   |
| MspFrag70360  | 9  | 96973400  | 96973891  | 491   | 0.000929497 | 2.981638233 | Methylated   |
| MspFrag70456  | 9  | 97748603  | 97750172  | 1569  | 0.002909797 | 2.823916466 | Methylated   |
| MspFrag71178  | 9  | 113740606 | 113743218 | 2612  | 0.006644975 | 2.659912862 | Methylated   |
| MspFrag71795  | 9  | 126535808 | 126536225 | 417   | 0.005765219 | 2.902858217 | Methylated   |
| MspFrag72963  | 9  | 133687920 | 133688807 | 887   | 0.000192661 | 3.341344063 | Methylated   |
| MspFrag73097  | 9  | 134886561 | 134886112 | 2051  | 0.006959198 | 2.72962585  | Methylated   |
| MspFrag73104  | 9  | 134960258 | 134960367 | 109   | 0.005018302 | 3.983963816 | Methylated   |
| MspFrag73278  | 9  | 136193070 | 136193195 | 125   | 0.006126014 | 2.469235543 | Methylated   |
| MspFrag73920  | 9  | 137327343 | 137328255 | 912   | 0.005770753 | 2.699820266 | Methylated   |
| MspFrag74447  | 10 | 668920    | 669051    | 131   | 0.003875585 | 3.028209591 | Methylated   |
| MspFrag74539  | 10 | 1209179   | 1209354   | 175   | 0.003077052 | 2.64048552  | Methylated   |
| MspFrag76448  | 10 | 43866040  | 43872622  | 6582  | 0.003442878 | 2.678356112 | Methylated   |
| MspFrag76542  | 10 | 45901999  | 45903475  | 1476  | 0.004180865 | 2.70086349  | Methylated   |
| MspFrag76644  | 10 | 47903972  | 47905269  | 1297  | 0.000374614 | 3.632704093 | Methylated   |
| MspFrag76730  | 10 | 49533637  | 49533797  | 160   | 0.006351474 | 3.454926345 | Methylated   |
| MspFrag77442  | 10 | 72647384  | 72647661  | 277   | 0.008596683 | 2.379976489 | Methylated   |
| MspFrag77791  | 10 | 76838962  | 76839181  | 219   | 0.000219854 | 3.282730321 | Methylated   |
| MspFrag77801  | 10 | 76967447  | 76972659  | 5212  | 0.002519673 | 2.732788427 | Methylated   |
| MspFrag77838  | 10 | 79146404  | 79147248  | 844   | 0.000154345 | 7.133784796 | Methylated   |
| MspFrag77889  | 10 | 80560705  | 80561551  | 846   | 0.000118091 | 3.458137069 | Methylated   |
| MspFrag77954  | 10 | 81731874  | 81732028  | 154   | 0.003021772 | 2.717316723 | Unmethylated |
| MspFrag78508  | 10 | 95937627  | 95938241  | 614   | 0.008628668 | 3.072327546 | Methylated   |
| MspFrag79783  | 10 | 112669188 | 112669531 | 343   | 0.0082013   | 5.53098353  | Methylated   |
| MspFrag79813  | 10 | 112829231 | 112831510 | 2279  | 0.001249869 | 2.856764107 | Methylated   |
| MspFrag79839  | 10 | 114915673 | 114916792 | 1119  | 0.008909285 | 2.624531163 | Methylated   |
| MspFrag79841  | 10 | 115124522 | 115126447 | 1925  | 0.003088965 | 2.815323359 | Methylated   |
| MspFrag80300  | 10 | 122206798 | 122207098 | 300   | 0.000414539 | 3.133630785 | Methylated   |
| MspFrag80748  | 10 | 128863663 | 128863800 | 137   | 0.002141593 | 2.913698486 | Methylated   |
| MspFrag81646  | 10 | 135370368 | 135370474 | 106   | 0.001595624 | 2.989231394 | Methylated   |
| MspFrag81708  | 10 | 135376987 | 135377093 | 106   | 0.00345825  | 2.947335497 | Methylated   |
| MspFrag82521  | 11 | 1439004   | 1440097   | 1093  | 0.004717098 | 2.641819655 | Methylated   |
| MspFrag82632  | 11 | 1939718   | 1939913   | 195   | 0.007706373 | 3.375884002 | Methylated   |
| MspFrag82801  | 11 | 2774758   | 2774946   | 188   | 0.006054461 | 2.687221516 | Methylated   |
| MspFrag84585  | 11 | 45156513  | 45158467  | 1954  | 0.000232504 | 3.271321322 | Methylated   |
| MspFrag84594  | 11 | 45254547  | 45259178  | 4631  | 0.006630011 | 2.847659407 | Methylated   |
| MspFrag84932  | 11 | 49393831  | 49397188  | 3357  | 0.002759676 | 2.741504547 | Methylated   |
| MspFrag85025  | 11 | 5700906   | 57001013  | 107   | 0.00771522  | 2.622931218 | Unmethylated |
| MspFrag85877  | 11 | 64237075  | 64237429  | 354   | 0.003392381 | 2.663629938 | Methylated   |
| MspFrag86856  | 11 | 67479942  | 67480731  | 789   | 0.002256357 | 4.424556585 | Methylated   |
| MspFrag87002  | 11 | 68514044  | 68514526  | 482   | 0.004275965 | 2.612103048 | Methylated   |
| MspFrag87235  | 11 | 70824160  | 70824441  | 281   | 0.008690282 | 2.412753573 | Unmethylated |
| MspFrag87379  | 11 | 72270991  | 72277403  | 6412  | 0.003092215 | 2.75612817  | Methylated   |
| MspFrag87426  | 11 | 72745477  | 72745741  | 264   | 0.000129323 | 3.392184453 | Methylated   |
| MspFrag87718  | 11 | 76428722  | 76428965  | 243   | 0.002309678 | 5.196405736 | Methylated   |
| MspFrag87819  | 11 | 78046977  | 78048762  | 1785  | 0.001745956 | 3.306054812 | Methylated   |
| MspFrag88050  | 11 | 91597385  | 91597610  | 225   | 0.00386607  | 2.937138453 | Methylated   |
| MspFrag88210  | 11 | 94523458  | 94523572  | 114   | 0.003701949 | 2.665243664 | Methylated   |
| MspFrag88658  | 11 | 114451489 | 114454990 | 3501  | 0.003224819 | 2.613625884 | Methylated   |
| MspFrag89105  | 11 | 119940946 | 119941110 | 164   | 0.000203199 | 3.322493005 | Methylated   |
| MspFrag89612  | 11 | 129848683 | 129848803 | 120   | 0.001558569 | 12.24232765 | Methylated   |
| MspFrag89679  | 11 | 133293139 | 133293303 | 164   | 0.001654087 | 2.873098192 | Methylated   |
| MspFrag90104  | 12 | 3179349   | 3179669   | 320   | 0.004154064 | 6.199967058 | Methylated   |
| MspFrag91019  | 12 | 26577181  | 26580672  | 3491  | 0.001839242 | 2.782181099 | Methylated   |
| MspFrag91174  | 12 | 30919880  | 30921930  | 2050  | 0.004079372 | 2.892426888 | Methylated   |
| MspFrag91412  | 12 | 40594351  | 40608665  | 14314 | 0.001316909 | 3.176883014 | Methylated   |
| MspFrag91553  | 12 | 44669832  | 44669953  | 121   | 0.008905404 | 2.468979809 | Unmethylated |
| MspFrag91594  | 12 | 45063783  | 45063926  | 143   | 0.00178205  | 2.763561691 | Unmethylated |
| MspFrag91615  | 12 | 45915248  | 45915631  | 383   | 7.68E-08    | 6.637940552 | Unmethylated |
| MspFrag92791  | 12 | 55916408  | 55916525  | 117   | 0.000659246 | 3.016037675 | Methylated   |
| MspFrag94232  | 12 | 106410441 | 106412770 | 2329  | 0.005946654 | 2.581072671 | Methylated   |
| MspFrag94627  | 12 | 112004055 | 112004521 | 466   | 0.006400319 | 2.508734467 | Methylated   |
| MspFrag94677  | 12 | 112366387 | 112366526 | 139   | 0.00864461  | 2.41239942  | Methylated   |
| MspFrag94727  | 12 | 113195150 | 113201829 | 6679  | 0.006568889 | 2.665415264 | Methylated   |
| MspFrag94834  | 12 | 114547151 | 114550147 | 2996  | 0.008690932 | 2.374427212 | Methylated   |
| MspFrag94840  | 12 | 115209325 | 115215498 | 6173  | 0.006303329 | 2.523785901 | Methylated   |
| MspFrag95542  | 12 | 123321352 | 123323837 | 2485  | 0.003314525 | 2.860144429 | Methylated   |
| MspFrag95605  | 12 | 123823478 | 123824655 | 1177  | 0.00041448  | 6.415010231 | Methylated   |
| MspFrag95712  | 12 | 126155194 | 126155459 | 265   | 0.00412745  | 2.803760739 | Methylated   |
| MspFrag95715  | 12 | 126155617 | 126155741 | 124   | 0.005012831 | 3.286166866 | Methylated   |
| MspFrag96247  | 12 | 131712579 | 131712699 | 120   | 0.001057538 | 3.018841364 | Methylated   |
| MspFrag96450  | 13 | 18129680  | 18137344  | 7664  | 0.001778223 | 2.822928156 | Methylated   |
| MspFrag96504  | 13 | 19289178  | 19290691  | 1513  | 0.005279395 | 2.660447705 | Methylated   |
| MspFrag96732  | 13 | 20847129  | 20851678  | 4549  | 0.002018    | 3.985627755 | Methylated   |
| MspFrag99475  | 13 | 111658718 | 111660375 | 1657  | 0.000802545 | 4.411491394 | Methylated   |
| MspFrag99815  | 13 | 113234062 | 113236825 | 2763  | 0.008619606 | 2.583344331 | Methylated   |
| MspFrag100101 | 14 | 18960232  | 18960350  | 118   | 5.57E-05    | 6.472965497 | Methylated   |
| MspFrag100583 | 14 | 28313966  | 28323149  | 9183  | 0.001426254 | 2.879279369 | Methylated   |
| MspFrag100660 | 14 | 31072888  | 31076485  | 3597  | 0.006969095 | 2.831117234 | Methylated   |
| MspFrag100734 | 14 | 33599634  | 33602913  | 3279  | 0.000623745 | 3.033938154 | Methylated   |
| MspFrag102000 | 14 | 64077190  | 64077336  | 146   | 0.008475116 | 2.701900337 | Unmethylated |
| MspFrag102345 | 14 | 70178382  | 70178506  | 124   | 0.004439497 | 3.005437461 | Unmethylated |
| MspFrag102563 | 14 | 73899039  | 73902262  | 3223  | 0.001276898 | 2.998982371 | Methylated   |
| MspFrag103062 | 14 | 89042697  | 89046787  | 4090  | 0.004753004 | 2.525517002 | Methylated   |
| MspFrag103436 | 14 | 95406409  | 95408127  | 1718  | 0.001263069 | 2.90231312  | Methylated   |
| MspFrag103496 | 14 | 96277560  | 96277779  | 219   | 0.009176824 | 4.245402867 | Methylated   |
| MspFrag103824 | 14 | 100601942 | 100602090 | 148   | 0.002271238 | 2.847946617 | Methylated   |
| MspFrag104070 | 14 | 102466623 | 102466748 | 125   | 0.001449902 | 3.543756732 | Methylated   |
| MspFrag104346 | 14 | 103677070 | 103677319 | 249   | 0.00171355  | 3.062062274 | Methylated   |
| MspFrag104917 | 15 | 19048129  | 19048239  | 110   | 0.000285647 | 4.877000612 | Methylated   |
| MspFrag105067 | 15 | 21006802  | 21006907  | 105   | 0.000156932 | 3.83949233  | Methylated   |
| MspFrag105113 | 15 | 23472515  | 23474582  | 2067  | 0.001041525 | 2.899124627 | Methylated   |
| MspFrag105138 | 15 | 23952040  | 23955843  | 3803  | 0.003301059 | 3.756028172 | Methylated   |
| MspFrag105296 | 15 | 26782174  | 26782383  | 209   | 0.005591479 | 2.909876438 | Unmethylated |
| MspFrag105316 | 15 | 27192906  | 27193544  | 638   | 0.008301522 | 2.784568356 | Methylated   |
| MspFrag105327 | 15 | 27415562  | 27417845  | 2283  | 0.000337613 | 3.419362264 | Methylated   |
| MspFrag105348 | 15 | 27702244  | 27708405  | 6161  | 0.000281347 | 3.242510483 | Methylated   |
| MspFrag106676 | 15 | 50863847  | 50864085  | 238   | 0.005649772 | 2.899414058 | Methylated   |
| MspFrag106995 | 15 | 58857551  | 58858940  | 1389  | 0.008203799 | 2.512038238 | Methylated   |
| MspFrag107471 | 15 | 65904935  | 65905087  | 152   | 4.89E-05    | 3.694147568 | Unmethylated |
| MspFrag107647 | 15 | 67629312  | 67631671  | 2359  | 0.000642141 | 3.117231568 | Methylated   |
| MspFrag107816 | 15 | 70876328  | 70876659  | 331   | 0.00182563  | 2.876546032 | Methylated   |
| MspFrag108611 | 15 | 80122439  | 80122600  | 161   | 0.000437579 | 3.141833845 | Methylated   |
| MspFrag109342 | 15 | 89301037  | 89301443  | 406   | 0.001289041 | 2.855634526 | Methylated   |
| MspFrag109533 | 15 | 94685083  | 94685212  | 129   | 0.0077133   | 2.40779288  | Unmethylated |
| MspFrag109536 | 15 | 94688193  | 94689027  | 834   | 0.003276224 | 3.093213482 | Methylated   |
| MspFrag109650 | 15 | 97376032  | 97376191  | 159   | 0.007676208 | 2.80111082  | Unmethylated |
| MspFrag109913 | 15 | 100319862 | 100321689 | 1827  | 0.00710363  | 2.73382836  | Methylated   |





|               |    |           |           |      |             |             |              |  |  |
|---------------|----|-----------|-----------|------|-------------|-------------|--------------|--|--|
| MspFrag150401 | 22 | 24141696  | 24141809  | 113  | 0.000901446 | 3.166338087 | Unmethylated |  |  |
| MspFrag150450 | 22 | 25310636  | 25310786  | 150  | 0.005592567 | 2.645212098 | Methylated   |  |  |
| MspFrag150463 | 22 | 25821084  | 25821480  | 396  | 0.00872533  | 2.93244293  | Methylated   |  |  |
| MspFrag150466 | 22 | 26316902  | 26320173  | 3271 | 0.00389136  | 2.757636472 | Methylated   |  |  |
| MspFrag150525 | 22 | 26701459  | 26702863  | 1404 | 0.008350897 | 5.52995021  | Unmethylated |  |  |
| MspFrag150945 | 22 | 31491879  | 31493291  | 1412 | 0.002589071 | 2.713909291 | Methylated   |  |  |
| MspFrag151874 | 22 | 40631471  | 40631578  | 107  | 0.005348105 | 4.626783725 | Methylated   |  |  |
| MspFrag151887 | 22 | 40635731  | 40635890  | 159  | 0.008589274 | 2.428676027 | Unmethylated |  |  |
| MspFrag152100 | 22 | 42010336  | 42012449  | 2113 | 0.002541264 | 2.957775324 | Methylated   |  |  |
| MspFrag152134 | 22 | 42155460  | 42155650  | 190  | 0.000672851 | 3.136628943 | Methylated   |  |  |
| MspFrag152273 | 22 | 43970600  | 43971671  | 1071 | 0.002187545 | 2.714634624 | Methylated   |  |  |
| MspFrag152623 | 22 | 46645154  | 46646974  | 1820 | 3.36E-05    | 4.227076782 | Methylated   |  |  |
| MspFrag152786 | 22 | 48487471  | 48488247  | 776  | 0.004943526 | 2.517209244 | Methylated   |  |  |
| MspFrag153392 | 23 | 149780    | 149948    | 168  | 0.002203921 | 3.217392869 | Methylated   |  |  |
| MspFrag153442 | 23 | 265754    | 265888    | 134  | 0.00863661  | 8.997774987 | Methylated   |  |  |
| MspFrag154341 | 23 | 19290342  | 19292799  | 2457 | 0.000465304 | 3.751168833 | Unmethylated |  |  |
| MspFrag154453 | 23 | 21741315  | 21743280  | 1965 | 0.00566159  | 2.593799308 | Methylated   |  |  |
| MspFrag154605 | 23 | 24798734  | 24798846  | 112  | 0.005547793 | 2.556658449 | Methylated   |  |  |
| MspFrag155014 | 23 | 39721718  | 39721822  | 104  | 0.000406895 | 3.315020596 | Unmethylated |  |  |
| MspFrag155117 | 23 | 39820347  | 39821019  | 672  | 0.006917437 | 2.434665061 | Methylated   |  |  |
| MspFrag155254 | 23 | 43999924  | 44000934  | 1010 | 0.004798652 | 2.788009716 | Methylated   |  |  |
| MspFrag155721 | 23 | 50047309  | 50047500  | 191  | 0.002963609 | 2.828986404 | Methylated   |  |  |
| MspFrag156038 | 23 | 67135706  | 67135834  | 128  | 0.00419103  | 4.071254836 | Methylated   |  |  |
| MspFrag156756 | 23 | 106320877 | 106322093 | 1216 | 0.002824622 | 11.11766882 | Methylated   |  |  |
| MspFrag156941 | 23 | 114787487 | 114787724 | 237  | 0.002719738 | 2.719918036 | Methylated   |  |  |
| MspFrag158142 | 23 | 152015047 | 152016538 | 1491 | 2.38E-05    | 3.847933361 | Methylated   |  |  |
| MspFrag158245 | 23 | 152553756 | 152553888 | 132  | 0.002115116 | 2.781465207 | Methylated   |  |  |
| MspFrag158705 | 24 | 261091    | 261793    | 702  | 0.007191549 | 2.574421033 | Methylated   |  |  |
| MspFrag158734 | 24 | 269488    | 269667    | 179  | 0.008445458 | 9.043557652 | Unmethylated |  |  |
| MspFrag158784 | 24 | 289159    | 289722    | 563  | 0.000724008 | 3.338818594 | Methylated   |  |  |
| MspFrag158895 | 24 | 572963    | 573425    | 462  | 0.008716097 | 3.081697239 | Methylated   |  |  |
| MspFrag158904 | 24 | 592479    | 594645    | 2166 | 0.001244071 | 3.167514533 | Methylated   |  |  |
| MspFrag158920 | 24 | 1514977   | 1515236   | 259  | 0.00493747  | 2.559964837 | Methylated   |  |  |
| MspFrag158991 | 24 | 1763725   | 1763853   | 128  | 0.003605113 | 3.712529413 | Methylated   |  |  |
| MspFrag159134 | 24 | 7687625   | 7688422   | 797  | 0.003225566 | 2.872014102 | Methylated   |  |  |
| MspFrag159222 | 24 | 10627096  | 10627206  | 110  | 0.000334202 | 3.211031484 | Methylated   |  |  |
| MspFrag159404 | 24 | 24746034  | 24747567  | 1533 | 0.006856104 | 2.454131347 | Methylated   |  |  |

Supplemental Table 6

**Bisulfite Genomic Sequencing:**

The primer sequence, amplicon length and annealing temperatures used for bisulfite genomic sequencing

| Gene         | Sequence (5' → 3')                                                     | Annealing Temp ( C) | Amplicon Length (bp) |
|--------------|------------------------------------------------------------------------|---------------------|----------------------|
| MspFrag80169 | F:GTAGAATTTTTGTTGGTTTTYGGTAGTTTT<br>R:AATTCRTCCTCTTCRCTACTCTAACCAAAT   | 60                  | 294bp                |
| MspFrag33136 | F: TATGGAGTTAGAGGYGTTTTAGGAGGTAAG<br>R:TTCCCCTACRCCAACACTACTAATATAAAAC | 60                  | 276bp                |
| MspFrag82859 | F:TTTTGTTGTAGGYGGGGTTTTAGTTAG<br>R:TCTCTCAAAATATCCCACACATAATCCCTC      | 55                  | 317bp                |
